# Supplementary material for: Traditional, complementary and alternative medicine use in Sub-Saharan Africa: a systematic review
Source: PubMed Central journal article supplement — BMJ Glob Health. 2018 Oct 31;3(5):e000895. doi: 10.1136/bmjgh-2018-000895 (PMC6231111; doi:10.1136/bmjgh-2018-000895), 2018-10-31
Supplement: bmjgh-2018-000895supp001.pdf [file bmjgh-2018-000895supp001.pdf]

**Supplement file 1: Summary of the included articles**

**A= Prevalence of use of TCAM, B=Profile of TCAM users, C=Drivers and barriers of TCAM use D= Types of TCAM use, E = Non-Disclosure of T&CM use to healthcare providers, F= prevalence of Concurrent use of TCAM and allopathic medicine, G=TCAM reported Adverse effect, H=Estimated Cost of TCAM**

| Author/ Year              | Country | Research Focus                                                                  | Methodology                                             | Target Population              | Sample | Appraisal score | Main Findings                                                                                                                                                                                                   | Themes | Additional notes                                                                                               |
|---------------------------|---------|---------------------------------------------------------------------------------|---------------------------------------------------------|--------------------------------|--------|-----------------|-----------------------------------------------------------------------------------------------------------------------------------------------------------------------------------------------------------------|--------|----------------------------------------------------------------------------------------------------------------|
| <b>GENERAL POPULATION</b> |         |                                                                                 |                                                         |                                |        |                 |                                                                                                                                                                                                                 |        |                                                                                                                |
| Abodunrin et al 2011      | Nigeria | Prevalence, pattern, behaviour and determinants of Alternative Therapy (AT) use | Quantitative cross-sectional questionnaire based survey | Adult male and female ≥18years | 500    | 6               | 67.7% used alternative therapies (AT). In which 44.8% and 30.4% used local and imported therapies respectively. Marital status , educational status and occupation were associated with alternative therapy use | A, B   | 3.5% were considered as safe users and being male, not married and educated were likely to be safe users of AT |

|                       |         |                                                                          |                                         |                           |      |       |                                                                                                                                                 |     |                                               |
|-----------------------|---------|--------------------------------------------------------------------------|-----------------------------------------|---------------------------|------|-------|-------------------------------------------------------------------------------------------------------------------------------------------------|-----|-----------------------------------------------|
| Allabi, et al 2011    | Benin   | Prevalence, socio-demographic correlates and types of plant medicine use | Quantitative questionnaire based survey | mothers and caregivers    | 1000 | 7     | 51.04% of inhabitants were herbal medicine users. Users were likely to be younger people                                                        | A,B | malaria treatment recording the highest usage |
| Awad et al 2006       | Sudan   | Self-medication                                                          | Quantitative questionnaire based survey | Adults                    | 1200 | 8     | Proprietary medicines alone were used by 28.3% (CI: 25.6-31.2), herbs alone by 20.7% (CI: 18.3-23.4), while 32.8% (CI: 29.9-35.8) had used both | A,F |                                               |
| Awodele et al 2014    | Nigeria | Safety of Herbal Medicines Use:                                          | Quantitative questionnaire based survey | Adults                    | 400  | -     | 51 (12.6%) of respondents had experienced adverse effects. (82.4%) believed that herbal medicines are safe for use                              | G   |                                               |
| Aziato and Antwi 2016 | Ghana   | Facilitators and barriers of herbal medicine use                         | Qualitative face-to-face interviews     | Ghanaian adults ≥18 years | 16   | ----- | Drivers of herbal medicine use include convincing information to enhance the initiation of herbal medicine use, effectiveness                   |     |                                               |

|                     |         |                                                            |                            |                        |     |   |                                                                                                                                                                                                                                                                                                                                                                                                                                   |          |                                   |
|---------------------|---------|------------------------------------------------------------|----------------------------|------------------------|-----|---|-----------------------------------------------------------------------------------------------------------------------------------------------------------------------------------------------------------------------------------------------------------------------------------------------------------------------------------------------------------------------------------------------------------------------------------|----------|-----------------------------------|
|                     |         |                                                            |                            |                        |     |   | of herbal medicine, personal preference for herbal medicine, perceived ineffectiveness of western medicine and integration of spirituality in herbal medicine. Barriers to herbal medicine use were negative perceptions and attitudes about herbal medicine, poor vending environment, poor knowledge of vendors, high cost of herbal products at credible herbal clinics and inconsistent effectiveness of some herbal products |          |                                   |
| Bamidele et al 2009 | Nigeria | Knowledge, attitude and determinants of use of alternative | Quantitative questionnaire | adults male and female | 812 | 8 | 54.6% have used one form of complementary therapies. No association between age, sex,                                                                                                                                                                                                                                                                                                                                             | A,B, C,D | 35.7% of the respondents who were |

|                   |         |                                                       |                                         |                      |     |   |                                                                                                                                                                                           |   |                                             |
|-------------------|---------|-------------------------------------------------------|-----------------------------------------|----------------------|-----|---|-------------------------------------------------------------------------------------------------------------------------------------------------------------------------------------------|---|---------------------------------------------|
|                   |         | medical therapy                                       | based survey                            |                      |     |   | educational level or religion and the patronage of AMT. Drivers of use include cheap 56 (21.4%); accessible 43 (16.4%) and acceptable 35 (13.4%). 80.5% of users used herbal preparations |   | aware of prefers AMT over orthodox medicine |
| Banwat et al 2015 | Nigeria | Prevalence and correlates of alternative medicine use | Quantitative questionnaire based survey | working-class adults | 390 | 5 | 79.3% were alternative medicine users. Poor knowledge and being educated were associated with alternative medicine use AT was considered to be effective and safe among                   | A |                                             |

|                                 |           |                                                                                                          |                                         |                                          |                      |   |                                                                                                                                                                                                                          |     |  |
|---------------------------------|-----------|----------------------------------------------------------------------------------------------------------|-----------------------------------------|------------------------------------------|----------------------|---|--------------------------------------------------------------------------------------------------------------------------------------------------------------------------------------------------------------------------|-----|--|
| Birhan et al 2011               | Ethiopia  | Prevalence and correlate of use of traditional medicine practitioner                                     | Quantitative Questionnaire based survey | traditional healers and patients         | 10 TH & 306 patients | 6 | 52% utilized traditional medicine clinics. Reasons for use were efficacy, low cost and dissatisfaction with modern medicine. Low income, educated and government employee were more likely to visit a traditional healer | A,C |  |
| Chingwaru& Vidmar 2016          | Zimbabwe  | Prevalence, perceptions and factors influencing the use of traditional and complementary medicine (T&CM) | Quantitative Questionnaire based survey | Adult male and female ( $\geq 15$ years) | 155                  |   | Concurrent use of T&CM and allopathic medicines was 60.0% (95% confidence interval 51.9% to 69.5%). being educated to secondary level or lower                                                                           | B,F |  |
| Chintamunnee& Mahomoodally 2012 | Mauritius | Prevalence and pattern of use of                                                                         | Quantitative face-to-face               | Adult 40-89 years                        | 334                  | 8 | 76.6% were users of herbal remedies. Age, educational level,                                                                                                                                                             | A,B |  |

|                       |              |                                                                             |                                           |        |     |   |                                                                                   |   |                                                                                                                           |
|-----------------------|--------------|-----------------------------------------------------------------------------|-------------------------------------------|--------|-----|---|-----------------------------------------------------------------------------------|---|---------------------------------------------------------------------------------------------------------------------------|
|                       |              | herbal medicine                                                             | interviews using structured questionnaire |        |     |   | income group and the use of natural remedies                                      |   |                                                                                                                           |
| De Jager et al (2010) | South Africa | Utilization of traditional medicine                                         | Quantitative questionnaire based survey   | adults | 113 | 7 | 43.8% used traditional medicine of which 31.3% obtained from a traditional healer | A |                                                                                                                           |
| Duru et al 2016       | Nigeria      | Prevalence and correlates of combined Orthodox and Traditional Medicine Use | Quantitative questionnaire based survey   | Adults | 422 | 5 | 77.5% used traditional medicine whilst 63.7% practised medical pluralism.         | A | age, sex, marital status, educational status, occupation, household size, family size, death of an under-five in the last |

|                      |          |                                                        |                                                                  |             |                                                    |   |                                                                                                                  |        |                                                                                                         |
|----------------------|----------|--------------------------------------------------------|------------------------------------------------------------------|-------------|----------------------------------------------------|---|------------------------------------------------------------------------------------------------------------------|--------|---------------------------------------------------------------------------------------------------------|
|                      |          |                                                        |                                                                  |             |                                                    |   |                                                                                                                  |        | one year, and the cause of death of the under-five were associated with the practiced medical pluralism |
| Flatie et al 2009    | Ethiopia | factors determining the use of TM and medicinal plants | Mixed method using semi-structured questionnaires survey and FGD | Adults. TH, | 1200 (HHs) 570 illness episodes and 14 TH 6(FGDs). | 6 | 4.6% of respondents had used traditional medicine low income household were associated with traditional medicine | A,B    |                                                                                                         |
| Galabuzi, et al 2010 | Uganda   | Preference and                                         | Mixed method                                                     | adults      | 120 interviews                                     | 5 | 43% relied on traditional                                                                                        | A,C, D |                                                                                                         |

|                 |          |                                                                       |                                                                                                      |                        |          |   |                                                                                                                                                                                                                                                                                                                                                                      |  |  |
|-----------------|----------|-----------------------------------------------------------------------|------------------------------------------------------------------------------------------------------|------------------------|----------|---|----------------------------------------------------------------------------------------------------------------------------------------------------------------------------------------------------------------------------------------------------------------------------------------------------------------------------------------------------------------------|--|--|
|                 |          | Awareness of traditional medicine                                     | Using focus group discussions (FGDs), informal and formal interviews, semi-structured questionnaires |                        | 6 (FGDs) |   | medicine. Reasons for visiting traditional medicine practitioner was traditional medicine has minimal side effect Majority shunned traditional medicine over biomedical care because of the perception that traditional health is devilish and evil in nature . Three forms of TM were reported herbalism (67%), spiritual counselling (23%) and bone setting (10%). |  |  |
| Gari et al 2015 | Ethiopia | Knowledge, attitude, practice, and management of traditional medicine | Quantitative questionnaire based survey                                                              | adults male and female | 282      | 7 | 94.22% have used traditional medicine in the last two years. Higher income earners were associated with TM practice                                                                                                                                                                                                                                                  |  |  |



|                   |       |                                                                                                  |                                         |                              |     |   |                                                                                                                                                                                                                |      |                                                                                                       |
|-------------------|-------|--------------------------------------------------------------------------------------------------|-----------------------------------------|------------------------------|-----|---|----------------------------------------------------------------------------------------------------------------------------------------------------------------------------------------------------------------|------|-------------------------------------------------------------------------------------------------------|
|                   |       |                                                                                                  |                                         |                              |     |   | Reasons for choice of TM because it is cheap accessible, acceptable and effective. Reason for WM preference over TM are not significantly researched, Not safe and effective. Medicinal herbs were mostly used |      |                                                                                                       |
| Gyasi et al 2015a | Ghana | Relationship between health insurance status and the pattern of traditional medicine utilisation | Quantitative questionnaire based survey | adults, aged $\geq 18$ years | 324 | 8 | 86% used traditional medicine<br>Effectiveness of TRM predicted its use for both insured and un-insured                                                                                                        | A,C  | no statistically significant association between national health insurance status and TRM utilisation |
| Gyasi et al 2015b | Ghana | Effect of spatial                                                                                | Quantitative                            | adults,                      | 324 | 8 | 86% used traditional                                                                                                                                                                                           | A, D | Use of TRM                                                                                            |

|                   |       |                                                                |                                         |                        |     |   |                                                                                               |        |                                                                                                                                                              |
|-------------------|-------|----------------------------------------------------------------|-----------------------------------------|------------------------|-----|---|-----------------------------------------------------------------------------------------------|--------|--------------------------------------------------------------------------------------------------------------------------------------------------------------|
|                   |       | variation on traditional medicine use                          | questionnaire based survey              | aged $\geq 18$ years   |     |   | medicine. biologically-based therapies and energy healing were common forms of TRM accessed   |        | did not vary location, but knowledge about and source of TRM significantly linked to location. Same sample and study setting used was used Gyasi et al 2015a |
| Gyasi et al 2015c | Ghana | Prevalence and predictors of traditional medicines utilisation | Quantitative questionnaire based survey | adults male and female | 324 | 9 | 86% used traditional medicine. low-income levels, being a trader, perceiving TRM as effective | A,B, D |                                                                                                                                                              |

|                   |       |                                                                   |                                                 |                                    |                                           |       |                                                                                                                                                                                                                   |       |  |
|-------------------|-------|-------------------------------------------------------------------|-------------------------------------------------|------------------------------------|-------------------------------------------|-------|-------------------------------------------------------------------------------------------------------------------------------------------------------------------------------------------------------------------|-------|--|
|                   |       |                                                                   |                                                 |                                    |                                           |       | and safe were associated with TRM use<br>TRM with biologically-based and distant/prayer therapies as the major forms of TRM utilised                                                                              |       |  |
| Gyasi et al 2015d | Ghana | Prevalence and pattern of traditional medical therapy utilisation | Quantitative questionnaire based survey         | adults male and female             | 324                                       | 9     | 86% used traditional medicine. Biologically-based therapies (88.5%) and distant prayer interventions (58.4%) were commonly used modalities. Non-disclosure rate of TRM use to health care professionals was 87.8% | A,D,E |  |
| Gyasi et al 2011  | Ghana | Perceptions of traditional medicine role in healthcare system     | Mixed method administered-questionnaire and in- | Traditional medicine practitioners | 70 TMP, 30 health care users, and 20 CMPs | ----- | Traditional Medicine is used to treat many diseases. Evidence of collaboration between TMP and CM. Traditional                                                                                                    | C     |  |

|                   |              |                                                    |                                                              |                                  |                               |       |                                                                                                                                                                                                                        |     |  |
|-------------------|--------------|----------------------------------------------------|--------------------------------------------------------------|----------------------------------|-------------------------------|-------|------------------------------------------------------------------------------------------------------------------------------------------------------------------------------------------------------------------------|-----|--|
|                   |              |                                                    | depth interviews.                                            | TMP, health care users, and CMPS |                               |       | Medicine is readily available to the people and also less expensive, hence easily accessible                                                                                                                           |     |  |
| Gyasi et al 2016  | Ghana        | Motivator for alternative therapies use            | Qualitative study using in-depth interviews                  | adults male and female           | 36                            | ----- | Pull factors were personal health beliefs, desire to take control of one's health, perceived efficacy, and safety of various modalities of TRM<br>Push factor was perceived poor services of the biomedical treatments | C   |  |
| Hughes et al 2015 | South Africa | Predictors and pattern of traditional medicine use | Longitudinal study – quantitative questionnaire based survey | adults male and female           | 456 were identified from 1030 | 6     | Overall prevalence of THM use was 27%. Participants used THM because of a family history (49%) and sociocultural beliefs (33%                                                                                          | A,C |  |

|                  |         |                                                                                |                                         |                        |      |   |                                                                                                                                                                                                                                                                                      |       |                                                                       |
|------------------|---------|--------------------------------------------------------------------------------|-----------------------------------------|------------------------|------|---|--------------------------------------------------------------------------------------------------------------------------------------------------------------------------------------------------------------------------------------------------------------------------------------|-------|-----------------------------------------------------------------------|
| Jimoh et al 2013 | Nigeria | Safety Concerns and Determinants of Complementary and Alternative Medicine Use | Quantitative Questionnaire based survey | Adults male and female | 500  | 8 | Lifetime CAM use was found to be 84% while current CAM use 61%. 35% preferred CAM over conventional medicine. Perceived effectiveness, affordability, availability and increased advertisement were reasons for CAM use. Darrhea and vomiting were common side effects (53%)reported | A,C,G | 56% intend use CAM in the future. Hygiene was the main safety concern |
| Kruk et al 2011  | Liberia | Determinants of utilization of formal and informal health care                 | Quantitative questionnaire based survey | adults male and female | 1435 | 9 | 44.1% visited traditional healer with 26.5 average number visit Usage of informal healthcare was more common among women, older, married and with poor physical and                                                                                                                  | A,B   |                                                                       |

|                   |              |                                                   |                                         |                                                        |                             |            |                                                                                                                             |   |                                       |
|-------------------|--------------|---------------------------------------------------|-----------------------------------------|--------------------------------------------------------|-----------------------------|------------|-----------------------------------------------------------------------------------------------------------------------------|---|---------------------------------------|
|                   |              |                                                   |                                         |                                                        |                             |            | mental health. Those with high economic status, literate and of mano ethnicity were less likely to use informal health care |   |                                       |
| Labhardt et al    | Cameroon     | traditional healers interaction with patient      | Quantitative questionnaire based survey | Traditional healers and western medicine practitioners | 15                          | 4          | Treatment cost (CFA) for Traditional Complementary Medicine =80000CFA Western Medicine= 6300CFA                             | H |                                       |
| Ladele et al 2014 | Nigeria      | utilization of traditional and orthodox medicines | Quantitative questionnaire based survey | Adult male and females                                 | 140                         | 5          | Traditional medicine users were more likely to be aged, less educated and from a larger household                           | B |                                       |
| Mathibela 2015    | South Africa | Socio-cultural profile of traditional healers     | Qualitative                             | healers and community                                  | 32 healers and 30 community | -----<br>- | 67% of community members visited traditional healers                                                                        | A | Most traditional Healers were female, |

|                          |                 |                                                                                         |                                                                      |                                                                          |                                                     |    |                                                                                                                                                                                                                                                                                      |             |                                                                                                                                       |
|--------------------------|-----------------|-----------------------------------------------------------------------------------------|----------------------------------------------------------------------|--------------------------------------------------------------------------|-----------------------------------------------------|----|--------------------------------------------------------------------------------------------------------------------------------------------------------------------------------------------------------------------------------------------------------------------------------------|-------------|---------------------------------------------------------------------------------------------------------------------------------------|
|                          |                 |                                                                                         |                                                                      | mem<br>bers                                                              | memb<br>ers                                         |    |                                                                                                                                                                                                                                                                                      |             | uneduc<br>ated,<br>and<br>attend<br>to 15<br>and 20<br>patient<br>s per<br>month                                                      |
| Mbereko & mahlatini 2014 | Zimbab<br>we    | Contributio<br>ns of<br>traditional<br>healers to<br>HIV/AIDS<br>prevention<br>and care | Quanti<br>tative<br>semi-<br>structu<br>red<br>questi<br>onnair<br>e | Com<br>muni<br>ty<br>mem<br>ber<br>and<br>tradit<br>ional<br>heale<br>rs | 160<br>80 TH<br>&80<br>Comm<br>unity<br>memb<br>ers | 6  | 56% had<br>consulted a<br>traditional healer<br>for their<br>condition.                                                                                                                                                                                                              | A           | Cost of<br>consult<br>ation<br>ranged<br>from<br>\$2-\$13                                                                             |
| Nxumalo et al 2011       | South<br>Africa | Determinan<br>ts of<br>traditional<br>healer<br>utilization                             | Quanti<br>tative<br>questi<br>onnair<br>e<br>based<br>survey         | Male<br>and<br>fema<br>le<br>resid<br>ents                               | 4762                                                | 11 | 1.2% utilized a<br>traditional<br>medicine healer.<br>Reasons for use<br>were continuity<br>of care and a<br>belief in their<br>effectiveness.<br>Users of<br>traditional<br>healers were<br>more likely to be<br>above 18years,<br>black race,<br>unemployed, low<br>socio-economic | A,B,<br>C,H | 10 per<br>cent of<br>their<br>househ<br>old<br>expend<br>iture in<br>the<br>previo<br>us<br>month<br>on<br>traditio<br>nal<br>healers |

|                      |         |                                              |                            |                |     |   |                                                                                                                                                                                                                                                                                                                                                                                                                                                                              |        |  |
|----------------------|---------|----------------------------------------------|----------------------------|----------------|-----|---|------------------------------------------------------------------------------------------------------------------------------------------------------------------------------------------------------------------------------------------------------------------------------------------------------------------------------------------------------------------------------------------------------------------------------------------------------------------------------|--------|--|
|                      |         |                                              |                            |                |     |   | status, of poor health status, not married and reside in rural of informal urban settlement. Traditional healer utilization rates (0.02 visits per month) were lower than that of public sector clinics (0.18 visits per month) or hospitals (0.09 visits per month). Two-thirds of all households (64 per cent) and approximately 72 per cent of households in the poorest quintile spent more than 10 per cent of their monthly expenditure on traditional healer services |        |  |
| Okoronkwo et al 2014 | Nigeria | Prevalence and patterns of complementary and | Quantitative questionnaire | Adult male and | 732 | 6 | 84.7% were CAM users. 40% of the participants combined CAM                                                                                                                                                                                                                                                                                                                                                                                                                   | A,D, G |  |



|                     |         |                                                                   |                                         |                        |     |   |                                                                                                                                                                                                                 |        |  |
|---------------------|---------|-------------------------------------------------------------------|-----------------------------------------|------------------------|-----|---|-----------------------------------------------------------------------------------------------------------------------------------------------------------------------------------------------------------------|--------|--|
|                     |         | alternative medicine use, perceived benefits, and adverse effects | based survey                            | female                 |     |   | with conventional medicine Biological products, followed by spiritual therapy were commonly used CAM modalities 184 (29.7%) reported having experienced adverse reactions                                       |        |  |
| Onyiapat et al 2011 | Nigeria | Prevalence and pattern of use of herbal medicine                  | Quantitative questionnaire based survey | adults male and female | 732 | 7 | 84.7% were CAM users. Biological products, followed by prayer/faith healing were common CAM methods used. Major reasons for using CAM include their natural state and also for health promotion and maintenance | A,C, D |  |
| Opara& Osayi 2016   | Nigeria | Prevalence and pattern of use of herbal medicine                  | Quantitative questionnaire              | adults male and        | 600 | 3 | 53.6% were users. Media, cultural beliefs, and cost among others were                                                                                                                                           | A,C    |  |

|                    |                                                          |                                                                          |                                                       |                                           |                                                          |    |                                                                                                                                                                                         |       |  |
|--------------------|----------------------------------------------------------|--------------------------------------------------------------------------|-------------------------------------------------------|-------------------------------------------|----------------------------------------------------------|----|-----------------------------------------------------------------------------------------------------------------------------------------------------------------------------------------|-------|--|
|                    |                                                          |                                                                          | based survey                                          | female                                    |                                                          |    | found to affect utilization of herbal medicine                                                                                                                                          |       |  |
| Oreagba et al 2011 | Nigeria                                                  | Prevalence and pattern of use of herbal medicine                         | Quantitative questionnaire based survey               | adults male and female                    | 388                                                      | 7  | 66.8% were herbal medicine users. Respondents who were unemployed and unskilled were likely users of herbal medicine . 20.8% of those who experienced mild to moderate adverse effects. | A,B,G |  |
| Osemene et al 2013 | Nigeria                                                  | Comparative assessment attributes of herbal and orthodox medicines       | Quantitative questionnaire based survey               | adults male and female                    | 360                                                      | 7  | 41% used herbs. Herbs were rated higher than conventional medicine due to safety and degree of advertisement.                                                                           | A     |  |
| Oyebode et al 2016 | Middle-income countries including Ghana and South Africa | Use of traditional medicine in middle-income countries: a WHO-SAGE study | Quantitative multinational questionnaire based survey | adults ( $\geq 18$ years) male and female | Total 35 334<br>Ghana =4661<br>and<br>South Africa =3411 | 10 | 40 (1.7%) participants in South Africa and 123 (1.5%) participants in Ghana reported that they had visited a traditional                                                                | A,H   |  |

|                       |                                     |                                                                                                 |                                                       |                           |           |    |                                                                                                                                                                                                                                                                  |     |  |
|-----------------------|-------------------------------------|-------------------------------------------------------------------------------------------------|-------------------------------------------------------|---------------------------|-----------|----|------------------------------------------------------------------------------------------------------------------------------------------------------------------------------------------------------------------------------------------------------------------|-----|--|
|                       |                                     |                                                                                                 |                                                       |                           |           |    | <p>medicine practitioner. TM consultation over the previous 12 months was 3.1% in Ghana and 0.1% in South Africa</p> <p>Total cost to household Mean (SD) in Ghana 157 792.8 (787 230.3) for Western medicine 143 173.9 (364 428.2) for Traditional medicine</p> |     |  |
| Plezter& Pengpid 2016 | 32 countries including South Africa | Prevalence and Determinants of Traditional, Complementary and Alternative Medicine Provider Use | Quantitative multinational questionnaire based survey | ≥16y ears male and female | N=52, 801 | 10 | <p>prevalence of TCAM provider use, in Australia 34.7%, in Europe ranging from under 10% in Bulgaria, Poland and Slovenia to 35.4% in France, in Asia from 16.7% in Russia to over 50% in China mainland, the Philippines and Republic of Korea, and over</p>    | A,B |  |

|                 |              |                                                                 |                                         |            |     |   |                                                                                                                                                                                                                                                                                   |        |  |
|-----------------|--------------|-----------------------------------------------------------------|-----------------------------------------|------------|-----|---|-----------------------------------------------------------------------------------------------------------------------------------------------------------------------------------------------------------------------------------------------------------------------------------|--------|--|
|                 |              |                                                                 |                                         |            |     |   | 20% in the USA, Chile and South Africa.<br>middle age, female sex, lower educational status, not having a religious affiliation, larger household size, not having a health insurance, could not pay for medical treatment when needed it were associated with TCAM provider use. |        |  |
| Pouliot M, 2011 | Burkina Faso | Prevalence and determinants of traditional medicine consumption | Quantitative questionnaire based survey | adult Male | 205 | 7 | 51.5% used traditional medicine at some point traditional medicine was primarily relied on by middle-aged individuals from relatively uneducated low socioeconomic households who were living in villages with                                                                    | A,B, H |  |

|                      |         |                                                         |                                         |                                      |     |   |                                                                                                                                                                                                                                                                                            |       |  |
|----------------------|---------|---------------------------------------------------------|-----------------------------------------|--------------------------------------|-----|---|--------------------------------------------------------------------------------------------------------------------------------------------------------------------------------------------------------------------------------------------------------------------------------------------|-------|--|
|                      |         |                                                         |                                         |                                      |     |   | <p>limited allopathic medicine service provision.</p> <p>Average financial cost of treatment (CFA)</p> <p>Self-care with traditional medicine =1250 = \$2.85</p> <p>Traditional healer= 2091= \$4.77</p> <p>Note: 1 USD = 438.29 CFA</p>                                                   |       |  |
| Sarki & Danjuma 2015 | Nigeria | Prevalence and determinants of traditional medicine use | Quantitative questionnaire based survey | male and female resident 15-59 years | 350 | 5 | <p>94.3% used traditional medicine. Age, education, and income, have no significant influence on the use of Traditional Medicine by the respondents.</p> <p>accessibility, low cost, effectiveness and belief in safeness and tradition influence the respondents to use the medicine.</p> | A,B,C |  |

|                              |           |                                                         |                                                                                                                              |                        |     |   |                                                                                                                                                                                                                                                      |        |  |
|------------------------------|-----------|---------------------------------------------------------|------------------------------------------------------------------------------------------------------------------------------|------------------------|-----|---|------------------------------------------------------------------------------------------------------------------------------------------------------------------------------------------------------------------------------------------------------|--------|--|
| Sato 2012                    | Ghana     | traditional medicine use and socioeconomic status       | Quantitative questionnaire based survey                                                                                      | Adults male and female | 772 | 9 | traditional medicines were likely used by low economic class                                                                                                                                                                                         | B      |  |
| Stanifer et al 2015          | Tanzania  | Prevalence and determinants of Traditional Medicine Use | mixed method study using focus group discussions (FGD) and in-depth key informants interviews and questionnaire based survey | All adults             | 655 | 9 | 56% were traditional medicine users. Drivers and barriers of traditional medicine use include biomedical healthcare delivery, credibility of traditional practices, strong cultural identities, individual health status, and disease understanding. | A,C    |  |
| Suroowan, &Mahomoodally,2013 | Mauritius | Complementary and alternative                           | Quantitative                                                                                                                 | women                  | 384 | 6 | Common CAM therapies were                                                                                                                                                                                                                            | D,E, G |  |

|                      |       |                                           |                                       |                              |    |       |                                                                                                                                                                                                                                                                                                           |   |  |
|----------------------|-------|-------------------------------------------|---------------------------------------|------------------------------|----|-------|-----------------------------------------------------------------------------------------------------------------------------------------------------------------------------------------------------------------------------------------------------------------------------------------------------------|---|--|
|                      |       | medicine use among Mauritian women        | questionnaire based survey            |                              |    |       | biologically-based therapies were most commonly used (75.0%) followed by mind body interventions (9.5%), (11%) had discussed the type of CAM they were using with their physician. Adverse effects like hypertension and gastrointestinal toxicity were also reported with the use of some plant species. |   |  |
| Tabi et al 2006      | Ghana | determinant of choice of health seeking   | Qualitative                           | male and female(25-60 years) | 9  | ----- | perceived evil and devilish nature of TCAM                                                                                                                                                                                                                                                                | C |  |
| Tchacondo et al 2011 | Togo  | Herbal Remedies and Their Adverse Effects | Quantitative semi structured question | Traditional healers          | 54 |       | 20 adverse effects were linked to the administration of these drugs, and among them; diarrhoea,                                                                                                                                                                                                           | G |  |

|                     |          |                                                                   |                                         |                       |     |   |                                                                                                                                                                                                  |       |                                                                               |
|---------------------|----------|-------------------------------------------------------------------|-----------------------------------------|-----------------------|-----|---|--------------------------------------------------------------------------------------------------------------------------------------------------------------------------------------------------|-------|-------------------------------------------------------------------------------|
|                     |          |                                                                   | onnaire study                           |                       |     |   | abdominal pains, polyuria, general weakness and vomiting were the most frequently encountered                                                                                                    |       |                                                                               |
| Usifoh,& Udezi 2013 | Nigeria  | Social and economic factors influencing the patronage and use CAM | Quantitative questionnaire based survey | Adults                | 400 | 5 | 67.7% were CAM users. Age, occupation, educational status, marriage type, religion were associated with CAM use. Key reasons for use were its being cheap and can cure many diseases             | A,B,C |                                                                               |
| Wassie et al 2015   | Ethiopia | Knowledge, attitude, and utilization of traditional medicine      | Quantitative questionnaire based survey | adult male and female | 403 | 6 | 70.9% had used traditional medicine. Age, educational status, and occupation were associated with traditional medicine use. cultural acceptability, lesser cost, and good outcome of traditional | A,B,C | The study failed to determine whether respondent with less education / educat |



|                                                             |         |                                                                          |                                                         |                                               |     |       |                                                                                                                                          |     |                                                                             |
|-------------------------------------------------------------|---------|--------------------------------------------------------------------------|---------------------------------------------------------|-----------------------------------------------|-----|-------|------------------------------------------------------------------------------------------------------------------------------------------|-----|-----------------------------------------------------------------------------|
|                                                             |         |                                                                          |                                                         |                                               |     |       | medicine were drivers for use                                                                                                            |     | ed or unemployed or otherwise were associated with traditional medicine use |
| <b>PREGNANCY, CHILD BIRTH AND GYNAECOLOGICAL CONDITIONS</b> |         |                                                                          |                                                         |                                               |     |       |                                                                                                                                          |     |                                                                             |
| Addo, VN 2007                                               | Ghana   | Socio-demographic characteristics and the pattern of herbal medicine use | Quantitative cross-sectional questionnaire based survey | women                                         | 597 | 5     | Greater than 50% reportedly used herbal medicine. Being unskilled, less educated were predictors of herbal medicine use.                 | A,B |                                                                             |
| Akeju et al 2016                                            | Nigeria | Determinants of health care seeking behaviour during pregnancy           | Qualitative Focus group discussion                      | Pregnant women, mothers, male decision-makers | 403 | ----- | Traditional medicine providers were preferred source of healthcare among pregnant women. Low cost service was reason for TMP preference. | C   | The use of traditional providers or prayer houses does                      |

|                     |       |                                                                |                                                                               |                                                                                                       |     |   |                                                                                                                                                                            |   |                                                                                                                                                                                                                     |
|---------------------|-------|----------------------------------------------------------------|-------------------------------------------------------------------------------|-------------------------------------------------------------------------------------------------------|-----|---|----------------------------------------------------------------------------------------------------------------------------------------------------------------------------|---|---------------------------------------------------------------------------------------------------------------------------------------------------------------------------------------------------------------------|
|                     |       |                                                                |                                                                               | rs,<br>opini<br>on<br>leade<br>rs,<br>TBA<br>,<br>HCP,<br>and<br>healt<br>h<br>admi<br>nistra<br>tors |     |   |                                                                                                                                                                            |   | not<br>reporte<br>dly<br>prevent<br>women<br>from<br>register<br>ing at<br>the<br>health<br>centre,<br>and it<br>was<br>rare to<br>find<br>women<br>who<br>patroni<br>zed<br>only<br>one<br>type of<br>provid<br>er |
| Aryeetey et al 2015 | Ghana | Antenatal<br>Health<br>Seeking<br>Among<br>postpartum<br>Women | Quanti<br>tative<br>Questi<br>onnair<br>e<br>comm<br>unity<br>based<br>survey | Postp<br>artu<br>m<br>wom<br>en                                                                       | 300 | 5 | About 45% of<br>women<br>simultaneously<br>utilized both<br>ANC and<br>alternative care<br>providers<br>(ACP) including<br>traditional birth<br>attendants,<br>herbalists, | F |                                                                                                                                                                                                                     |

|                  |        |                                                  |                                         |                                  |      |   |                                                                                                                                                                                                                                                                     |       |                                                                                                                                                                                                           |
|------------------|--------|--------------------------------------------------|-----------------------------------------|----------------------------------|------|---|---------------------------------------------------------------------------------------------------------------------------------------------------------------------------------------------------------------------------------------------------------------------|-------|-----------------------------------------------------------------------------------------------------------------------------------------------------------------------------------------------------------|
|                  |        |                                                  |                                         |                                  |      |   | and spiritualists.                                                                                                                                                                                                                                                  |       |                                                                                                                                                                                                           |
| Banda et al 2007 | Zambia | Prevalence and correlates of herbal medicine use | Quantitative questionnaire based survey | HIV/AIDS positive pregnant women | 1128 | 6 | 30% visited a traditional healer in past. 21% currently utilizing traditional healer. No demographic differences exist between users and non-users. Main Reason for non-disclosure of TCAM use was fear of receiving in worse medical care from Health care worker. | A,B,E | However, users of traditional medicine were likely to be to drink alcohol during pregnancy, have 2 sex partners, engage in "dry sex," initiate sex with their partner, report a previously treated sexual |

|                   |          |                                                                      |                                         |                 |     |   |                                                                                                                                                         |        |                                                                               |
|-------------------|----------|----------------------------------------------------------------------|-----------------------------------------|-----------------|-----|---|---------------------------------------------------------------------------------------------------------------------------------------------------------|--------|-------------------------------------------------------------------------------|
|                   |          |                                                                      |                                         |                 |     |   |                                                                                                                                                         |        | y transmitted disease, and use contraception and less likely to adhere to ART |
| Bayisa et al 2014 | Ethiopia | Prevalence and pattern of herbal medicine use                        | Quantitative questionnaire based survey | Pregnant women. | 250 | 8 | 50.4% were herbal medicine users. 69.84% were used during the first trimester with Ginger being the most used                                           |        |                                                                               |
| Duru et al 2016a  | Nigeria  | Prevalence and Socio-demographic Determinants of Herbal Medicine use | Quantitative questionnaire based survey | Pregnant women  | 500 | 9 | 36.8% of pregnant women use herbal medicine<br>Age, marital Status, educational level, educational level of partner, and monthly income were associated | A,B, G |                                                                               |

|                   |         |                                                                              |                                         |                |     |   |                                                                                                                                                                                                                                                                   |        |  |
|-------------------|---------|------------------------------------------------------------------------------|-----------------------------------------|----------------|-----|---|-------------------------------------------------------------------------------------------------------------------------------------------------------------------------------------------------------------------------------------------------------------------|--------|--|
|                   |         |                                                                              |                                         |                |     |   | with herbal medicine use. More than half (53.3%) of the herbal drug users experienced one side effect or the other and the common side effects experienced with their use were; nausea, (100%), vomiting (77.6%), abdominal pain, (27.5%) and dizziness, (26.5%). |        |  |
| Ebuehi et al 2012 | Nigeria | Perception and utilization of traditional birth attendants by pregnant women | Quantitative questionnaire based survey | Pregnant women | 260 | 8 | 63.6% have ever used TBA service whilst 44.6% are current users and 61.9% of previous are current users. age, marital status, religion, ethnicity, educational level, occupation, and number of previous pregnancies were                                         | A, B,C |  |

|                   |         |                                                           |                                         |                |     |   |                                                                                                                                                                                                                                                                                                                                      |          |                                                                                                                                                  |
|-------------------|---------|-----------------------------------------------------------|-----------------------------------------|----------------|-----|---|--------------------------------------------------------------------------------------------------------------------------------------------------------------------------------------------------------------------------------------------------------------------------------------------------------------------------------------|----------|--------------------------------------------------------------------------------------------------------------------------------------------------|
|                   |         |                                                           |                                         |                |     |   | significantly associated with TBA utilization<br>Drivers for the use of TBA services were being cheap, effective accessible, and culturally acceptable.<br>passionate care                                                                                                                                                           |          |                                                                                                                                                  |
| Fakeye et al 2009 | Nigeria | Prevalence of use, attitude , knowledge and effect of use | Quantitative questionnaire based survey | pregnant women | 595 | 8 | More than two-third of respondents [67.5%] were users of herbal medicine. Low, cost, efficacy and safety over conventional medicine and alignment with cultural beliefs were reasons for use.<br>Age , educational status , and geopolitical zone were associated with current use of herbal medicine.<br>73 (18.0%) had experienced | A,B, D,G | It was difficult to know specifically which demographic variables(e.g young vs old or less educated vs highly educated etc were as only p-values |

|                    |          |                                                               |                                         |                |     |   |                                                                                                                                                                                                                                          |          |                |
|--------------------|----------|---------------------------------------------------------------|-----------------------------------------|----------------|-----|---|------------------------------------------------------------------------------------------------------------------------------------------------------------------------------------------------------------------------------------------|----------|----------------|
|                    |          |                                                               |                                         |                |     |   | some form of untoward effects post administration of herbal medicines. The side effects experienced included vomiting 27 (36.99%), dizziness 17 (23.3%), malaise 10 (13.7%), headache 10 (13.7%), rashes 6 (8.2%) and diarrhea 3 (4.1%). |          | were presented |
| Laelago et al 2016 | Ethiopia | Prevalence and factors associated with use of herbal medicine | Quantitative questionnaire based survey | pregnant women | 363 | 8 | 73.1 % used herbal medicine. Educational status, occupation, knowledge on herbal medicine and second trimester of pregnancy were the major factors affecting use of herbal medicine Reason for use cheap. Effective, and accessible.     | A,B, C,G |                |

|                    |               |                                                                 |                                                                |                |                                                                              |   |                                                                                                                                    |   |                                                                                                                                             |
|--------------------|---------------|-----------------------------------------------------------------|----------------------------------------------------------------|----------------|------------------------------------------------------------------------------|---|------------------------------------------------------------------------------------------------------------------------------------|---|---------------------------------------------------------------------------------------------------------------------------------------------|
|                    |               |                                                                 |                                                                |                |                                                                              |   | 8.1% experienced untoward effect on post administration<br><b>Burning sensation, Vomiting<br/>Dizziness ,Malaise<br/>Headache.</b> |   |                                                                                                                                             |
| Malan & Nueba 2011 | Côte d'Ivoire | Traditional practices and medicinal plants use during pregnancy | focus group method and Quantitative questionnaire based survey | pregnant women | 104 male and female of which 55 pregnant women 88 female traditional healers | 5 | 90.3 % of pregnant women use herbal medicine                                                                                       | A | No strong correlation between age, number of pregnancies and the knowledge of the obstetric plants (p=0.34).<br>Common indication for herbs |



|                    |          |                                             |                            |                |     |   |                                                                                      |             |                                                                                                                                                                               |
|--------------------|----------|---------------------------------------------|----------------------------|----------------|-----|---|--------------------------------------------------------------------------------------|-------------|-------------------------------------------------------------------------------------------------------------------------------------------------------------------------------|
|                    |          |                                             |                            |                |     |   |                                                                                      |             | use were 1) to ensure the good development of the foetus and to have thus a beautiful baby (51.9 %); 2) to facilitate labour (23.1 %), 3) to prevent or cure malaria (21.1 %) |
| Mekuria et al 2017 | Ethiopia | Prevalence and associated factors of herbal | Quantitative questionnaire | pregnant women | 364 | 9 | 48.6% used herbal medicine during current pregnancy. Low income, rural residence and | A,B, C,E, G |                                                                                                                                                                               |

|              |       |                                                          |                                         |                  |     |   |                                                                                                                                                                                                                                                                                                                                                                                          |        |  |
|--------------|-------|----------------------------------------------------------|-----------------------------------------|------------------|-----|---|------------------------------------------------------------------------------------------------------------------------------------------------------------------------------------------------------------------------------------------------------------------------------------------------------------------------------------------------------------------------------------------|--------|--|
|              |       | medicine use                                             | based survey                            |                  |     |   | illiteracy were predictors of herbal medicine use.. Key drivers of herbal medicine use were it being cheap, accessible and safe. Barriers were Lack of belief in the benefits of herbs and fear of it being safe.89.8% had not disclosed their use of herbal medicine. Most of herbal medicine users (87.6%) reported that they haven't experienced any apparent side effects from herbs |        |  |
| Mothupi 2014 | Kenya | Prevalence and associated factors of herbal medicine use | Quantitative questionnaire based survey | Postpartum women | 333 | 7 | 12% of women used herbal medicine during their most recent pregnancy. Women who were less educated and had history of use prior to index                                                                                                                                                                                                                                                 | A,B, E |  |

|                    |          |                                                                    |                                         |                |     |    |                                                                                                                                                                                                                                          |      |  |
|--------------------|----------|--------------------------------------------------------------------|-----------------------------------------|----------------|-----|----|------------------------------------------------------------------------------------------------------------------------------------------------------------------------------------------------------------------------------------------|------|--|
|                    |          |                                                                    |                                         |                |     |    | pregnancy were likely to used herbs. 12.5% of users disclosed such use to healthcare professionals. 20% concomitantly used herbs and allopathic medications. 87.5% of users did not disclosed their status to their health professional. |      |  |
| Mureyi, et al 2012 | Zimbabwe | Prevalence pattern and factors associated with herbal medicine use | Quantitative questionnaire based survey | women          | 248 | 10 | 52% of women have used herbal medicine in last pregnancy. Prenatal use of traditional medicine was associated with null parity and null gravidity                                                                                        | A, B |  |
| Nergard, 2015      | Mali     | Attitudes towards and use of medicinal plants                      | Quantitative questionnaire based survey | pregnant women | 209 | 8  | 79.9 % had used medicinal plants during pregnancy. no significant statistical differences in demographic                                                                                                                                 | A,B  |  |

|                   |         |                                                                                 |                                         |                                |     |       |                                                                                                                                                                                                                                                                                                                                                                                                                                                               |        |  |
|-------------------|---------|---------------------------------------------------------------------------------|-----------------------------------------|--------------------------------|-----|-------|---------------------------------------------------------------------------------------------------------------------------------------------------------------------------------------------------------------------------------------------------------------------------------------------------------------------------------------------------------------------------------------------------------------------------------------------------------------|--------|--|
|                   |         |                                                                                 |                                         |                                |     |       | characteristics between                                                                                                                                                                                                                                                                                                                                                                                                                                       |        |  |
| Nyeko, et al 2016 | Uganda  | Prevalence and factors associated with use of herbal medicines during pregnancy | Quantitative questionnaire based survey | women attending postnatal care | 383 | 8     | 20 % used herbal medicine during their current pregnancy. Users were likely to have the perception that herbs are effective, had a history of herbal medicine use, practised self-medication and far away from health facility. Drivers for use were HM cures many illnesses, is part of tradition, difficult accessing health facility and low cost of herbs. 90 % of the users of herbal medicines did not disclose their status to their health providers. | A,C, E |  |
| Okafor et al 2014 | Nigeria | Patterns of health-seeking behaviour                                            | qualitative study                       | women (15-45                   | 35  | ----- | Pregnant women seek both orthodox and unorthodox                                                                                                                                                                                                                                                                                                                                                                                                              | C      |  |

|                     |         |                                                                   |                                         |                                                                        |       |   |                                                                                                                                                                                                    |      |  |
|---------------------|---------|-------------------------------------------------------------------|-----------------------------------------|------------------------------------------------------------------------|-------|---|----------------------------------------------------------------------------------------------------------------------------------------------------------------------------------------------------|------|--|
|                     |         | among women during pregnancy and child birth                      |                                         | years) and delivered a baby in the previous 2 years prior to the study |       |   | maternity care. Drivers for the use traditional health care are traditional beliefs, cheaper charges effectiveness in the treatment of certain condition compared to conventional health providers |      |  |
| Ologe et al 2008    | Nigeria | Prevalence and pattern of use of herbal medicine                  | Quantitative questionnaire based survey | pregnant women                                                         | 500   | 8 | 12.2% took native herbal preparations traders were likely to be herbal medicine users                                                                                                              | A, B |  |
| Olusanya et al 2011 | Nigeria | Prevalence and maternal predictors of traditional maternity homes | Quantitative questionnaire based survey | postpartum women                                                       | 6,706 | 9 | Close to two – thirds (65.5%) utilized TBA during birth. Women who are less educated and low socioeconomic status, Muslim, prim parous, were more likely to deliver in TBA home                    | A,B  |  |

|                      |         |                                                         |                                         |                             |        |   |                                                                                                                                                                                                                                                                                          |        |  |
|----------------------|---------|---------------------------------------------------------|-----------------------------------------|-----------------------------|--------|---|------------------------------------------------------------------------------------------------------------------------------------------------------------------------------------------------------------------------------------------------------------------------------------------|--------|--|
| Sarmiento et al 2016 | Nigeria | Prevalence and determinants of traditional medicine use | Quantitative questionnaire based survey | Women (15-49) with children | 11 305 | 9 | 24.1% of women and 11.3% of children used traditional medicine for child birth and diarrhoea respectively. Users were less educated, accessed antenatal care less, experienced more family violence and were less likely to have birth certificates for their children. of children were | A,B    |  |
| Tamuno et al 2010    | Nigeria | Use, attitude and knowledge of herbal medicine          | Quantitative questionnaire based survey | Pregnant women              | 500    | 7 | 31.4% used herbal medicine. Users were likely to be of low economic status less educated and self-medicated with western medicine                                                                                                                                                        | A,B    |  |
| <b>HYPERTENSION</b>  |         |                                                         |                                         |                             |        |   |                                                                                                                                                                                                                                                                                          |        |  |
| Amira et al (2007)   | Nigeria | Prevalence, socio-demographic                           | Quantitative cross-                     | hypertensive                | 225    | 6 | 39.1% of hypertensive patients used                                                                                                                                                                                                                                                      | A,B, D |  |

|                     |          |                                                                         |                                                                 |                       |     |   |                                                                                                                                                                                                                                                                                   |                |  |
|---------------------|----------|-------------------------------------------------------------------------|-----------------------------------------------------------------|-----------------------|-----|---|-----------------------------------------------------------------------------------------------------------------------------------------------------------------------------------------------------------------------------------------------------------------------------------|----------------|--|
|                     |          | c and health - related correlates of CAM use                            | sectional questionnaire based survey                            | patients              |     |   | CAM. No significant difference exist between users and non-users with regards to patient's demographics, clinical profile, BMI and blood pressure control. Herbal were commonly used CAM therapy.                                                                                 |                |  |
| Erku & Mekuria 2016 | Ethiopia | Prevalence and correlates of complementary and alternative medicine use | Quantitative study cross-sectional questionnaire based survey . | hypertensive patients | 412 | 7 | 67.8% of hypertensive patients were CAM users. Being male, residing in a rural area, not educated, a low income earner, had family history of hypertension and had a complication were predictors of CAM use. Herbal therapy was the commonest CAM modalities. Not satisfied with | A,B, C, D, E,G |  |

|  |  |  |  |  |  |  |                                                                                                                                                                                                                                                                                                                                                                                                                                                                                              |  |  |
|--|--|--|--|--|--|--|----------------------------------------------------------------------------------------------------------------------------------------------------------------------------------------------------------------------------------------------------------------------------------------------------------------------------------------------------------------------------------------------------------------------------------------------------------------------------------------------|--|--|
|  |  |  |  |  |  |  | <p>biomedical therapy, cam safety and effectiveness, being in line with cultural value were motivators whilst lack of belief in effectiveness and safety and not recommended by doctor were barriers.</p> <p>70.2% did not disclose CAM use for their physician. Reasons for non-disclosure includes: fear of their health provider's response, perceived healthcare provider's lack of knowledge of TCAM. About 79.9%(20.1) of CAM users have not experienced any apparent side effects</p> |  |  |
|--|--|--|--|--|--|--|----------------------------------------------------------------------------------------------------------------------------------------------------------------------------------------------------------------------------------------------------------------------------------------------------------------------------------------------------------------------------------------------------------------------------------------------------------------------------------------------|--|--|



|                    |              |                                                                     |                                                              |                       |                             |   |                                                                                                                                   |           |                                                                                                                                                        |
|--------------------|--------------|---------------------------------------------------------------------|--------------------------------------------------------------|-----------------------|-----------------------------|---|-----------------------------------------------------------------------------------------------------------------------------------|-----------|--------------------------------------------------------------------------------------------------------------------------------------------------------|
| Hughes et al 2013  | South Africa | Prevalence and determinants and pattern of traditional medicine use | Longitudinal study – quantitative questionnaire based survey | hypertensive patients | 135 from pure study of 1030 | 5 | There were 135 THM users, 21% of whom used THM to treat hypertension. Majority (82.1%) of the hypertensive THM users were females | A,B       | Comparison of socio-demographic variables was done between hypertensive THM users and non-hypertensive THM users instead of hypertensive THM non-users |
| Kretchy et al 2014 | Ghana        | Prevalence and determinants CAM use                                 | Quantitative questionnaire based survey                      | hypertensive patients | 400                         | 6 | 19.5% of patients have used CAM. being male, can't afford medicine and experience side effect were                                | A,B, D, E | CAM users were likely to be non-                                                                                                                       |

|                       |         |                                                         |                                         |                       |     |   |                                                                                                                                                                                                                                                                                           |             |                                        |
|-----------------------|---------|---------------------------------------------------------|-----------------------------------------|-----------------------|-----|---|-------------------------------------------------------------------------------------------------------------------------------------------------------------------------------------------------------------------------------------------------------------------------------------------|-------------|----------------------------------------|
|                       |         |                                                         |                                         |                       |     |   | likely to use CAM<br>Majority using biological based therapies. 70% of CAM users had not disclosed their CAM use to their healthcare provider.                                                                                                                                            |             | adherent                               |
| Nuwaha & Muganzi 2013 | Uganda  | Prevalence and determinants of traditional medicine use | Quantitative questionnaire based survey | Hypertensive Patients | 258 | 7 | 56.2%) had ever used alternative medicine. 28.6%) were currently using alternative medicine alone or in combination with modern medicine (50%). CAM users were less likely to have received lifestyle advised Agreeing that alternative medicine is effective was a predictor of CAM use. | A           |                                        |
| Olisa & Oyelola 2009  | Nigeria | Prevalence and pattern of use of herbal medicine        | Quantitative questionnaire              | hypertensive patients | 500 | 9 | 24% used herbal medicine. Older patients were likely users of herbal medicine use. Driver of                                                                                                                                                                                              | A,B, C, E,G | Eight of the 12 affected had a reoccur |

|                    |         |                                                           |              |                          |     |   |                                                                                                                                                                                                                                                                                                                                                                                                                        |        |                                                                                                                                                         |
|--------------------|---------|-----------------------------------------------------------|--------------|--------------------------|-----|---|------------------------------------------------------------------------------------------------------------------------------------------------------------------------------------------------------------------------------------------------------------------------------------------------------------------------------------------------------------------------------------------------------------------------|--------|---------------------------------------------------------------------------------------------------------------------------------------------------------|
|                    |         |                                                           | based survey |                          |     |   | herbal medicine use were perceived failure and high cost of allopathic medicines, sociocultural practices, inaccessibility of medical centres and negative attitude of healthcare providers. 71.15%, failed to tell their doctor about their use of herbal medicines. Clinically evident adverse effects due to co-administration of herbal medicines and allopathic agents were reported by 21.04% of the respondents |        | rence after re-use of the offending herbal medicine. The 12 respondents who experienced adverse effects discontinued use of herbal medicines completely |
| Osamor& Owumi 2010 | Nigeria | Prevalence and factors associated with traditional herbal | Mixed method | Hypertensive patient and | 440 | 5 | 29% used CAM. Common forms used were herbs. being male , belief in                                                                                                                                                                                                                                                                                                                                                     | A,B, D |                                                                                                                                                         |

|                     |            |                                                                         |                                                               |                                                               |      |   |                                                                                                                                                                                                                         |       |                                                                                    |
|---------------------|------------|-------------------------------------------------------------------------|---------------------------------------------------------------|---------------------------------------------------------------|------|---|-------------------------------------------------------------------------------------------------------------------------------------------------------------------------------------------------------------------------|-------|------------------------------------------------------------------------------------|
|                     |            | medicine use                                                            |                                                               | CAM practitioners                                             |      |   | supernatural causes of hypertension<br>lack of belief that hypertension is preventable and having a family history of hypertension.<br>Age, educational level and occupation were not independent predictors of CAM use |       |                                                                                    |
| <b>HIV/AIDS</b>     |            |                                                                         |                                                               |                                                               |      |   |                                                                                                                                                                                                                         |       |                                                                                    |
| Audet et al 2014    | Mozambique | Link between consultation with traditional healer delays in HIV testing | Quantitative study cross-sectional questionnaire based survey | newly diagnosed HIV-infected adults ( $\geq 18$ years of age) | 530  | 9 | 62% initially visited a healer                                                                                                                                                                                          | A     | Consultation with a traditional healer was associated with delay time of diagnosis |
| Auerbach et al 2012 | Uganda     | Traditional Herbal Medicine Use and                                     | Quantitative study cross-section                              | HIV/AIDS and non                                              | 1000 | 7 | 4.2% used herbs, Herb users did not differ by age ( $p = 0.61$ ) or gender                                                                                                                                              | A,B,G | Traditional herbal medicine use                                                    |

|                     |         |                                               |                                                     |                                     |     |   |                                                                                                                                                                                                                                                                                                                                                                                                                                                                  |     |                                                                                                                                                                                                                               |
|---------------------|---------|-----------------------------------------------|-----------------------------------------------------|-------------------------------------|-----|---|------------------------------------------------------------------------------------------------------------------------------------------------------------------------------------------------------------------------------------------------------------------------------------------------------------------------------------------------------------------------------------------------------------------------------------------------------------------|-----|-------------------------------------------------------------------------------------------------------------------------------------------------------------------------------------------------------------------------------|
|                     |         | liver fibrosis                                | al<br>questi<br>onnair<br>e<br>based<br>survey<br>. | HIV<br>infec<br>ted<br>Patie<br>nts |     |   | (p= 0.15) from non-users. Herbs from the Asteraceae family (adjPRR = 5.0, 95% CI 2.9–8.7, p,0.001), and herbs from the Lamiaceae family (adjPRR = 3.4, 95% CI 1.2–9.2, p= 0.017) were associated with significant liver fibrosis. Among HIV infected participants, use of any herb (adjPRR = 2.3, 95% CI 1.0–5.0, p= 0.044) and use of herbs from the Asteraceae family (adjPRR = 5.0, 95% CI 1.7–14.7, p= 0.004) were associated with increased liver fibrosis. |     | was indepe<br>ndently<br>associa<br>ted<br>with a<br>substan<br>tial<br>increas<br>e in<br>signific<br>ant<br>liver<br>fibrosis<br>in both<br>HIV-<br>infecte<br>d and<br>HIV-<br>uninfec<br>ted<br>study<br>partici<br>pants |
| Awodele et al 2012a | Nigeria | Prevalence of use of complementary drugs with | Quanti<br>tative<br>study<br>cross-<br>section      | HIV<br>patie<br>nts                 | 354 | 7 | 8.2 % of the respondents' used herbal medicine concurrently with                                                                                                                                                                                                                                                                                                                                                                                                 | A,C |                                                                                                                                                                                                                               |

|                 |              |                                                                                              |                                                                               |                       |     |   |                                                                                                                                                                                                                  |        |                                                                 |
|-----------------|--------------|----------------------------------------------------------------------------------------------|-------------------------------------------------------------------------------|-----------------------|-----|---|------------------------------------------------------------------------------------------------------------------------------------------------------------------------------------------------------------------|--------|-----------------------------------------------------------------|
|                 |              | antiretroviral therapy                                                                       | al<br>questi<br>onnair<br>e<br>based<br>survey<br>.                           |                       |     |   | ARV therapy reasons for taking herbal was to boost immunity                                                                                                                                                      |        |                                                                 |
| Babb et al 2007 | South Africa | Prevalence of herbal medicine use                                                            | Mixed method cross-sectional questionnaire based survey & personal interviews | HIV patients, healers | 71  | 5 | 84% had used herbal medicine. 14 (32%) were currently. Lack of trust and belief in efficacy of traditional medicine Non-users was barrier to use. Participants spent £4 – 27 per month on traditional medicines. | A,C, H | 23% of patients on ART were also using traditional medicine     |
| Bepe et al 2011 | Zimbabwe     | Impact of herbal remedies on adverse effects and quality of life in HIV-infected individuals | Quantitative questionnaire based survey                                       | HIV/AIDS patients     | 151 | 6 | (54%) were taking antiretroviral drugs together with one or more traditional herbal remedies,                                                                                                                    | A      | Abdominal pain and rash was but quality of life associated with |

|                     |         |                                                                                      |                                         |                          |     |   |                                                                                                                                                                                                                                                                                        |       |                     |
|---------------------|---------|--------------------------------------------------------------------------------------|-----------------------------------------|--------------------------|-----|---|----------------------------------------------------------------------------------------------------------------------------------------------------------------------------------------------------------------------------------------------------------------------------------------|-------|---------------------|
|                     |         |                                                                                      |                                         |                          |     |   |                                                                                                                                                                                                                                                                                        |       | herbal medicine use |
| Ekwunife et al 2012 | Nigeria | Concurrent use of complementary and alternative medicine with antiretroviral therapy | Quantitative questionnaire based survey | HIV/AIDS patient         | 212 | 7 | 47.9% used CAM concurrently with antiretroviral drugs. CAM use was associated with low ART adherence. Patients attending rural clinic were likely to use CAM than those visiting semiurban clinic. Herbs and dietary supplements followed prayer and spirituality were common CAM used | A,B,D |                     |
| Gyasi et al 2013    | Ghana   | Prevalence and determinants and pattern of traditional medicine use                  | Quantitative questionnaire based survey | HIV-seropositive persons | 62  | 8 | 53.2% of patients used traditional medicine. Herbal therapy remained frequently used form of traditional medicine                                                                                                                                                                      | A,D   |                     |
| Horwitz et al 2013  | Uganda  | Socio-demographic determinant                                                        | quantitative                            | HIV-seropositive         | 450 | 7 | 78 participants (17%) visited a traditional healer/herbalist                                                                                                                                                                                                                           | A     |                     |

|                             |              |                                                               |                                         |                          |     |   |                                                                                                                                                                                                                                                                                                                                                                          |        |  |
|-----------------------------|--------------|---------------------------------------------------------------|-----------------------------------------|--------------------------|-----|---|--------------------------------------------------------------------------------------------------------------------------------------------------------------------------------------------------------------------------------------------------------------------------------------------------------------------------------------------------------------------------|--------|--|
|                             |              | of traditional practitioner utilization                       |                                         | persons                  |     |   | and/or a spiritual counsellor (TH/SC) during the 3 months prior to ART initiation TH/SC use does not delay initiation of ART.                                                                                                                                                                                                                                            |        |  |
| Hughes et 2012              | South Africa | Prevalence and predictors of traditional medicine utilization | Quantitative questionnaire based survey | HIV-seropositive persons | 100 | 6 | Sixteen percent of participants on ARV reported TM use. Seventy-nine percent used TM prior to a diagnosis of HIV. Patients were more likely to use TM if they were from rural province, female, older, unmarried, employed, less educated, or were HIV-positive for less than five years. 92.9% of users failed to disclose their TCAM use to their healthcare provider. | A,B, E |  |
| Langlois-Klassen et al 2007 | Uganda       | Prevalence pattern and factors                                | Quantitative                            | HIV/AIDS                 | 137 | 8 | 63.5% of AIDS patients had used herbal medicine.                                                                                                                                                                                                                                                                                                                         | A,B    |  |



|                             |        |                                                                                           |                               |                   |     |   |                                                                                                                                                                                                                                                                                                                                                              |      |         |
|-----------------------------|--------|-------------------------------------------------------------------------------------------|-------------------------------|-------------------|-----|---|--------------------------------------------------------------------------------------------------------------------------------------------------------------------------------------------------------------------------------------------------------------------------------------------------------------------------------------------------------------|------|---------|
|                             |        | associated with use of traditional medicine                                               | questionnaire based survey    | patients          |     |   | Patients who are educated, experiencing more symptoms, used herbs prior to diagnosis were more likely to use herbs                                                                                                                                                                                                                                           |      |         |
| Langlois-Klassen et al 2008 | Uganda | Communication between health providers and HIV-infected adults related to herbal medicine | cross-sectional, mixed method | HIV/AIDS patients | 137 | 7 | 16% of these respondents had informed their conventional medical practitioners about using these herbs. almost 68% of HIV-infected adults indicated they would be willing to discuss herbal medicine use if directly asked by a conventional medical practitioner, and majority (91%) were willing to adhere to physician's advice about herbal medicine use |      |         |
| Lubinga et al. 2012         | Uganda | Prevalence pattern and                                                                    | Quantitative                  | HIV/AIDS          | 334 | 8 | 46.4%) reported concomitant                                                                                                                                                                                                                                                                                                                                  | A, E | Time of |

|                |              |                                                                                    |                                         |                   |      |   |                                                                                                                                                               |      |                                                                                                                               |
|----------------|--------------|------------------------------------------------------------------------------------|-----------------------------------------|-------------------|------|---|---------------------------------------------------------------------------------------------------------------------------------------------------------------|------|-------------------------------------------------------------------------------------------------------------------------------|
|                |              | factors associated with Concomitant use of herbal medicine and allopathic medicine | questionnaire based survey              | S patients        |      |   | herbal medicines and ART use. 39.8% using herbal medicines at least once daily. 92.3% reported that the doctors were unaware of their use of herbal medicines |      | ART initiation, number of ART side effect, self-perceived health status were associated with dual herbal medicine and ART use |
| Malangu 2007   | South Africa | prevalence of use of over-the-counter, complementary and traditional medicines     | Quantitative questionnaire based survey | HIV/AIDS patients | 180  | 6 | 4.4% of respondents used ATM, 3.3% CAM                                                                                                                        | A    |                                                                                                                               |
| Mee et al 2014 | South Africa | Prevalence and determinants                                                        | Quantitative questionnaire              | deceased adults   | 6392 | 8 | Traditional healthcare use declined for all                                                                                                                   | A, B |                                                                                                                               |

|                   |          |                                                    |                                         |                                                        |     |   |                                                                                                                                                                                                                                                                                                            |     |  |
|-------------------|----------|----------------------------------------------------|-----------------------------------------|--------------------------------------------------------|-----|---|------------------------------------------------------------------------------------------------------------------------------------------------------------------------------------------------------------------------------------------------------------------------------------------------------------|-----|--|
|                   |          | traditional healthcare use                         | e based survey                          | HIV/AID, TB and other health conditions (aged over 18) |     |   | deaths, with higher levels throughout for those dying of HIV/AIDS and TB<br>40.6% of all deceased used traditional remedies and 60.3% death due to HIV/TB were users of traditional or herbal remedies<br>Higher traditional healthcare use was associated with Mozambican origin, lower education levels, |     |  |
| Monera et al 2012 | Zimbabwe | Prevalence and patterns of herbal medicine         | Quantitative questionnaire based survey | HIV-infected adults                                    | 263 | 8 | 68% used Moringa oleifera. Users were likely to be females and Christian                                                                                                                                                                                                                                   | A,B |  |
| Namuddu, 2011     | Uganda   | Prevalence and factors associated with traditional | Quantitative questionnaire              | HIV Patient                                            | 401 | 9 | 33.7% were traditional users. Users were likely to be younger(<39yrs),                                                                                                                                                                                                                                     | A,B |  |

|                      |              |                                                                        |                                         |                                                   |      |   |                                                                                                                                                                                                                                                                                                                             |        |                            |
|----------------------|--------------|------------------------------------------------------------------------|-----------------------------------------|---------------------------------------------------|------|---|-----------------------------------------------------------------------------------------------------------------------------------------------------------------------------------------------------------------------------------------------------------------------------------------------------------------------------|--------|----------------------------|
|                      |              | herbal medicine use                                                    | based survey                            |                                                   |      |   | non- adherent, experience side effect, started treatment less than 4 years and was sexually active                                                                                                                                                                                                                          |        |                            |
| Nlooto & Naidoo 2016 | South Africa | Prevalence and factors associated with traditional herbal medicine use | Quantitative questionnaire based survey | Adult HIV patients who had been on antiretroviral | 1748 | 8 | 21.85 % and 8.12 % of patients used traditional medicine pre and post ART respectively. Being Christian was associated with the use of ATM post ART. Females being black, Christian, at least completed high school and gaining some income were associated with ATM use prior to ART<br>2.12 % visited a CAM practitioner. | A,B    |                            |
| Onifade, et al 2013  | Nigeria      | Prevalence of use and Attitude towards                                 | Quantitative questionnaire              | HIV patients                                      | 640  | 3 | 76.5% used complementary therapy. 100 respondents                                                                                                                                                                                                                                                                           | A,E, H | 73.4% would denied the use |

|                     |         |                                                  |                                                                   |                                              |     |   |                                                                                                                                                                                                                                                             |           |                                                        |
|---------------------|---------|--------------------------------------------------|-------------------------------------------------------------------|----------------------------------------------|-----|---|-------------------------------------------------------------------------------------------------------------------------------------------------------------------------------------------------------------------------------------------------------------|-----------|--------------------------------------------------------|
|                     |         | herbal remedy by HIV/AIDS patients               | e based survey                                                    |                                              |     |   | combines herbal remedy with HAART. 64.1% of the respondents wanted herbal remedy as complementary therapy. 73.4% denied the use of herbal remedy when asked by their health provider.<br>% of income spent on herbal therapy<br><20% =92.2%<br>20-40%= 7.8% |           | of herbal remedy when asked by a medical practitioner, |
| Oshikoya et al 2014 | Nigeria | Prevalence and pattern of use of herbal medicine | Quantitative semi-structured (open and close-ended) questionnaire | Parents/caregivers of HIV positive children. | 187 | 8 | 96.8% of Parents/caregivers have used CAM for their children. Mind-body interventions (181; 36.6%) and biological products (179; 36.2%) were frequently used. Relatives, friends and neighbours influenced CM use.                                          | A, D,G, H |                                                        |

|                  |              |                                                                     |                                         |                       |     |   |                                                                                                                                                                                                                                                                                                    |       |  |
|------------------|--------------|---------------------------------------------------------------------|-----------------------------------------|-----------------------|-----|---|----------------------------------------------------------------------------------------------------------------------------------------------------------------------------------------------------------------------------------------------------------------------------------------------------|-------|--|
|                  |              |                                                                     |                                         |                       |     |   | Specific adverse effects of CMs observed in the patients by their parents/caregivers were vomiting (14), diarrhoea (14), nausea (13), abdominal pains (12), and headache (5). The average cost per month amongst the majority who used Complementary Medicine every day was ₦ 15,500 (US\$ 96.88). |       |  |
| Otang et al 2011 | South Africa | Prevalence, perceived benefits and effectiveness of herbal medicine | Quantitative questionnaire based survey | >18 HIV/AIDS patients | 101 | 6 | 39.6% used herbal medicine. Users were likely to be single, unemployed and with average of 5 signs/symptoms of opportunistic infection. Close to half of users reported that the                                                                                                                   | A,B,C |  |

|                    |              |                                                         |                                         |                       |     |    |                                                                                                                                                                                                                                                                                                                         |          |                                                                                                                     |
|--------------------|--------------|---------------------------------------------------------|-----------------------------------------|-----------------------|-----|----|-------------------------------------------------------------------------------------------------------------------------------------------------------------------------------------------------------------------------------------------------------------------------------------------------------------------------|----------|---------------------------------------------------------------------------------------------------------------------|
|                    |              |                                                         |                                         |                       |     |    | herbal medicine did not help their condition. Driver for use were : being part of tradition, allopathic medicine are expensive, better outcome if herbal medicine is used together with conventional medicine                                                                                                           |          |                                                                                                                     |
| Peltzer,et al 2008 | South Africa | Prevalence and determinants of traditional medicine use | Quantitative questionnaire based survey | HIV-positive patients | 618 | 11 | 51.3% were TCAM users. CAM users were likely to be female, educated, reside in rural area, low economic status, and on government grant and never or only once visited the clinic. 90% indicated that their health care provider was not aware that they were taking herbal therapies. 90%) indicated that their health | A,B, E,H | Being on a disability grant, number of HIV symptoms and family members not contributing to main source of household |

|                    |              |                                                                                     |                                                         |                       |     |    |                                                                                                                                                                                                                                                                                                                   |       |                                          |
|--------------------|--------------|-------------------------------------------------------------------------------------|---------------------------------------------------------|-----------------------|-----|----|-------------------------------------------------------------------------------------------------------------------------------------------------------------------------------------------------------------------------------------------------------------------------------------------------------------------|-------|------------------------------------------|
|                    |              |                                                                                     |                                                         |                       |     |    | care provider was not aware of their use of traditional medicine. Herbal therapies were the most expensive, with one average 128 Rand (range 0–1000) per month, followed by cannabis (37 Rand per month), faith healing methods (24.4 Rand per month) and micronutrients 7.2 Rand per months (1 US\$ = 7.60 Rand) |       | income to be associated with TCAM use    |
| Peltzer,et al 2010 | South Africa | Prevalence of traditional medicine use and non-adherence to anti-retroviral therapy | quantitative cross-sectional questionnaire based survey | HIV-positive patients | 735 | 10 | 77.4% and 31.9% used CAM prior to and after starting treatment respectively. TCAM use was associated with younger ages, higher educational, lower self-reported quality of life, a lack of understanding of                                                                                                       | A,B,H | The cohort was followed up to six months |



|                    |              |                                            |                           |                       |     |    |                                                                                                                                                                                                                                                                                                                                                                                                                                     |     |                            |
|--------------------|--------------|--------------------------------------------|---------------------------|-----------------------|-----|----|-------------------------------------------------------------------------------------------------------------------------------------------------------------------------------------------------------------------------------------------------------------------------------------------------------------------------------------------------------------------------------------------------------------------------------------|-----|----------------------------|
|                    |              |                                            |                           |                       |     |    | <p>CD4 count, higher self-reported HIV disease and treatment related knowledge and higher health care decision involvement</p> <p>Non-adherence was associated with CAM use , Herbal therapies</p> <p>Cost in Rand/month mean(SD) prior to ART(PA)=Time 129 (166) follow-up(FU)= 250 (330)</p> <p>Faith healing =PA=0.4 (1.0,) FU= 0.2 (1.7)</p> <p>Physical/body-mind therapy (e.g. exercise, massage = PA=9 (11) FU=0.8 (2.6)</p> |     |                            |
| Peltzer,et al 2011 | South Africa | Prevalence of traditional medicine use and | Longitudinal quantitative | HIV-positive patients | 735 | 10 | 77.4% and 16.1% used CAM prior to and after 20 months of treatment                                                                                                                                                                                                                                                                                                                                                                  | A,E | The cohort was followed up |

|                    |              |                                                                                               |             |                                                      |    |            |                                                                                                                                                                                                                                                                                                             |     |              |
|--------------------|--------------|-----------------------------------------------------------------------------------------------|-------------|------------------------------------------------------|----|------------|-------------------------------------------------------------------------------------------------------------------------------------------------------------------------------------------------------------------------------------------------------------------------------------------------------------|-----|--------------|
|                    |              | non-adherence to anti-retroviral therapy                                                      |             |                                                      |    |            | respectively. At baseline only 10.2% of patients reported that their health care provider was aware of their herbal remedy use. This figure declined to 4.7% after 6 months, 4.2% after 12 months.                                                                                                          |     | to 20 months |
| Puoane, et al 2012 | South Africa | Perception of healthcare workers, traditional healer and patients on traditional medicine use | Qualitative | HIV patients, health workers and traditional healers | 14 | -----<br>- | Patient were using THP before and after diagnosis and some practiced medical pluralism<br>Patients preferred not to disclose THP to health professionals because of lack of support and understanding.<br>Patients utilize THP because of family expectations, privacy and confidentiality, especially when | C,E |              |

|                      |              |                                                                                                        |                                         |                   |     |   |                                                                                                                                                                                                                                                                                                                                                          |       |  |
|----------------------|--------------|--------------------------------------------------------------------------------------------------------|-----------------------------------------|-------------------|-----|---|----------------------------------------------------------------------------------------------------------------------------------------------------------------------------------------------------------------------------------------------------------------------------------------------------------------------------------------------------------|-------|--|
|                      |              |                                                                                                        |                                         |                   |     |   | they have not disclosed their HIV status. Patients preferred not to disclose THP to health professionals because of lack of support and understanding.                                                                                                                                                                                                   |       |  |
| Mncengeli et al 2016 | South Africa | Concurrent use of Antiretroviral and African traditional medicines amongst people living with HIV/AIDS | Quantitative Questionnaire based survey | HIV/AIDS patients | 360 | 9 | Over 65% (185/281) reported ATM use before diagnosis with HIV whilst 77.6% (218/281) reported previous ATM use after their HIV diagnosis but before initiation with ARV. Place of residence (p=0.004), age (p<0.001) and education level (P=0.041) were found to be significantly and positively correlated with ATM use. 4.98% (14/281) of the patients | A,B,F |  |

|                                               |              |                                                     |                                            |                                     |      |   |                                                                                                                                                                                            |     |  |
|-----------------------------------------------|--------------|-----------------------------------------------------|--------------------------------------------|-------------------------------------|------|---|--------------------------------------------------------------------------------------------------------------------------------------------------------------------------------------------|-----|--|
|                                               |              |                                                     |                                            |                                     |      |   | used ATM and ARV concurrently during the study period                                                                                                                                      |     |  |
| Thielman et al 2014                           | Tanzania     | Healthcare seeking pattern                          | Quantitative cross-sectional survey        | HIV/AIDS Patients                   | 442  | 7 | 249 (56%) sought cure from a newly popularized religious healer                                                                                                                            | A   |  |
| Tamuno 2011                                   | Nigeria      | Traditional medicine use among HIV/AIDS patients    | cross-sectional questionnaire based survey | HIV/AIDS Patients                   | 400  | 5 | 110 (27.5%) admitted to using traditional medicine at home before their commencement of the antiretroviral therapy. (4.3%) used traditional medicine and antiretroviral drugs concurrently | A,F |  |
| <b>Malaria, Febrile Illness AND Diarrhoea</b> |              |                                                     |                                            |                                     |      |   |                                                                                                                                                                                            |     |  |
| Bakshi et al 2013                             | Sierra Leone | Prevalence and correlates of traditional treatments | Mixed method study. cross-sectional        | heads of households, and caregivers | 5951 | 6 | 31% and 22% of caregivers have used traditional remedies to treat childhood diarrhoea and fever                                                                                            | A,B |  |

|                   |      |                                                              |                                                           |                                     |     |   |                                                                                                                                                                                                                                                                                                               |   |                                                                                    |
|-------------------|------|--------------------------------------------------------------|-----------------------------------------------------------|-------------------------------------|-----|---|---------------------------------------------------------------------------------------------------------------------------------------------------------------------------------------------------------------------------------------------------------------------------------------------------------------|---|------------------------------------------------------------------------------------|
|                   |      |                                                              | questionnaire based survey & focus group discussion (FGD) | children under five years           |     |   | respectively. Traditional medicine users for fever and diarrhoea were likely to be Caregivers, who were not Mende, government use recommended salt sugar solution(for diarrhoea), without a vaccination card, whose child had more than two illnesses, Muslim(fever)and non-users of any allopathic treatment |   |                                                                                    |
| Diallo et al 2006 | Mali | Use of modern and traditional medicine for Malaria treatment | Restrospective Quantitative questionnaire based survey    | Children with uncomplicated malaria | 952 | 6 | For uncomplicated malaria, children were first treated with modern medicines alone (40%), a mixture of modern and traditional treatments (33%), or traditional treatment alone (27%). For                                                                                                                     | A | self-medication (traditional or modern medicine, see below) as first treatment was |

|                 |              |                                               |                                         |                         |      |    |                                                                                                       |   |                                                                                                                  |
|-----------------|--------------|-----------------------------------------------|-----------------------------------------|-------------------------|------|----|-------------------------------------------------------------------------------------------------------|---|------------------------------------------------------------------------------------------------------------------|
|                 |              |                                               |                                         |                         |      |    | severe episodes, a traditional treatment alone was used in 50% of the cases.                          |   | the rule for uncomplicated malaria. For second episode visit to traditional healer or health facility was common |
| Diaz et al 2013 | Sierra Leone | Pattern and determinant of Healthcare seeking | Quantitative questionnaire based survey | Care givers of Children | 5951 | 10 | Preference for traditional care was due to its accessibility and barriers to conventional health care | C | use of traditional treatments was significantly associated with not seeking outside care                         |

|                    |         |                                                                                         |                                              |                                      |       |   |                                                                                                                                                                                                        |     |                                                                                    |
|--------------------|---------|-----------------------------------------------------------------------------------------|----------------------------------------------|--------------------------------------|-------|---|--------------------------------------------------------------------------------------------------------------------------------------------------------------------------------------------------------|-----|------------------------------------------------------------------------------------|
| Eseigbe et al 2012 | Nigeria | Health Care Seeking Behavior among Caregivers of Sick Children Who Had Cerebral Malaria | Prospective review of cerebral malaria cases | Care givers of children with malaria | 33    |   | Health care options utilized before presentation at our facility were formal health facility 24 (72.7%), patent medicine seller 12 (36.4%), home treatment 10 (30.3%), and herbal concoction 6 (18.2%) | A   |                                                                                    |
| Farag et al 2013   | Mali    | Pattern and determinant of Healthcare seeking                                           | Quantitative questionnaire based survey      | children                             | 1,000 | 7 | 57% of caregiver used traditional treatment for their child's diarrhoea                                                                                                                                | A   | Use of traditional treatment was associated with having a severe form of diarrhoea |
| Graz et al 2015    | Mali    | Patterns of treatment seeking behaviour for malaria                                     | Quantitative questionnaire                   | Paediatric population with           | 400   | 4 | 58% of children with uncomplicated malaria were treated with                                                                                                                                           | A,H | This was a significant increase                                                    |

|               |         |                                                                                  |                                         |                                         |       |   |                                                                                                                                                                                                                                                                                   |        |                           |
|---------------|---------|----------------------------------------------------------------------------------|-----------------------------------------|-----------------------------------------|-------|---|-----------------------------------------------------------------------------------------------------------------------------------------------------------------------------------------------------------------------------------------------------------------------------------|--------|---------------------------|
|               |         |                                                                                  | based survey                            | uncomplicated malaria                   |       |   | herbal medicine alone.<br>1000 CFA fr approximately E1.5) varied greatly<br>Half of modern treatments were obtained for free, but costs went up to 89 000 CFA fr. For traditional treatments, three-quarters were free, but there were also extreme prices of up to 75 000 CFA fr |        | From 24% 10 years earlier |
| Jombo et 2010 | Nigeria | Prevalence socio-demographic determinant of traditional practitioner utilization | Quantitative questionnaire based survey | adult women aged 18 years old and above | 2 075 | 6 | 49.7% of respondents utilized a traditional healer for malaria treatment. Being old, less educated and those with blue – collar jobs were associated with TM use<br>Being cheap, accessible, akin to cultural values,                                                             | A,B, C |                           |



|                        |              |                                                          |                                                               |                                          |                                                |   |                                                                                                                                                                               |     |                                   |
|------------------------|--------------|----------------------------------------------------------|---------------------------------------------------------------|------------------------------------------|------------------------------------------------|---|-------------------------------------------------------------------------------------------------------------------------------------------------------------------------------|-----|-----------------------------------|
|                        |              |                                                          |                                                               |                                          |                                                |   | were key drivers of TM use                                                                                                                                                    |     |                                   |
| Mensah & Gyasi, 2012   | Ghana        | Prevalence and associated factors of herbal medicine use | Mixed Method structured questionnaire and in-depth interviews | malaria patients and traditional healers | 189 malaria patients and 5 traditional healers | 6 | 50.3% used herbal medicine to treat malaria. Use of herbal medicine was associated with the perception of it being relatively safe, cost-effective, efficacious and available | A   | 29.7% practiced medical pluralism |
| Njoroge, et al 2007    | Kenya        | Herbal medicine use for diarrhoea management             | Quantitative questionnaire based survey                       | herbalists and the slum dwellers         | 42                                             | 3 | 97.45% had used herbal treatment. 52.5%) first seek treatment for diarrhoea from herbalists before going to the hospital. Being cheap and effective were reasons for use.     | A,C |                                   |
| Ranasinghe, et al 2015 | Sierra Leone | Prevalence and pattern of use of herbal medicine         | Quantitative questionnaire based survey                       | adult male and female residents          | 810                                            | 8 | 55% used herbs or its combination. 37% of herb users taking two or more herbs together when ill. Moringa oleifera and Sarcocephalus                                           | A   |                                   |

|                       |         |                                                         |                                         |                            |        |   |                                                                                                                                                                                                                                                                                          |     |  |
|-----------------------|---------|---------------------------------------------------------|-----------------------------------------|----------------------------|--------|---|------------------------------------------------------------------------------------------------------------------------------------------------------------------------------------------------------------------------------------------------------------------------------------------|-----|--|
|                       |         |                                                         |                                         |                            |        |   | latifolius were the common herbs used.                                                                                                                                                                                                                                                   |     |  |
| Sarmiento et al 2016* | Nigeria | Prevalence and determinants of traditional medicine use | Quantitative questionnaire based survey | Women(15-49) with children | 11 305 | 9 | 24.1% of women and 11.3% of children used traditional medicine for child birth and diarrhoea respectively. Users were less educated, accessed antenatal care less, experienced more family violence and were less likely to have birth certificates for their children. of children were | A,B |  |
| <b>CANCER</b>         |         |                                                         |                                         |                            |        |   |                                                                                                                                                                                                                                                                                          |     |  |
| Asuzu,et al (2015)    | Nigeria | cancer patients' use of traditional healers             | Quantitative questionnaire based survey | cancer patients            | 400    | 7 | 34.5% of the patients patronized traditional healers, The cost of traditional treatment for cancer ranged between no cost                                                                                                                                                                | A,H |  |

|           |          |                                                                     |                                         |                 |     |   |                                                                                                                                                                                                                                                                                                                                                    |               |                                                                                                 |
|-----------|----------|---------------------------------------------------------------------|-----------------------------------------|-----------------|-----|---|----------------------------------------------------------------------------------------------------------------------------------------------------------------------------------------------------------------------------------------------------------------------------------------------------------------------------------------------------|---------------|-------------------------------------------------------------------------------------------------|
|           |          |                                                                     |                                         |                 |     |   | to N5,000 (that is approximately \$31.25 @ \$1 = N160) to be treated. The cost of orthodox care would range from a minimum of N40,000 to several millions of naira.                                                                                                                                                                                |               |                                                                                                 |
| Erku 2016 | Ethiopia | CAM Use and its association with quality of life of Cancer patients | Quantitative questionnaire based survey | cancer patients | 231 | 8 | 79% were CAM users, higher education, monthly income, disease stage and comorbidity were predictors of CAM use and traditional herbal based medicine was the most common type of CAM. Belief in advantages of CAM was common reason for CAM use. 79.2% did not disclose CAM use to their doctor. Most of CAM users (81.8%) did not experience side | A,B, C,D, E,G | no difference in QOL between users and non-users and higher non-disclosure rate among CAM users |

|                   |         |                                                             |                                         |                    |     |       |                                                                                                                                                                                                                                                                                                                                                                                                          |             |  |
|-------------------|---------|-------------------------------------------------------------|-----------------------------------------|--------------------|-----|-------|----------------------------------------------------------------------------------------------------------------------------------------------------------------------------------------------------------------------------------------------------------------------------------------------------------------------------------------------------------------------------------------------------------|-------------|--|
|                   |         |                                                             |                                         |                    |     |       | effects from CAM use                                                                                                                                                                                                                                                                                                                                                                                     |             |  |
| Ezeome et al 2007 | Nigeria | Prevalence, pattern of use, and factors influencing the use | Quantitative questionnaire based survey | cancer patients    | 160 | 7     | 65.0% have used CAM since diagnosis. age, marital status, level of education, religious affiliation, or socioeconomic status were not predictors of CAM use. Most common CAM modalities were herbs and faith/prayer healing. 55.8% did not mention their use of CAM to their doctors and reason for non-disclosure was the doctor did not ask. More than 21% of users reported various unwanted effects. | A,B, D, E,G |  |
| Mwaka, et al 2015 | Uganda  | Barriers to biomedical care and use of traditional          | Qualitative                             | Men and women aged | 24  | ----- | Traditional medicines were used mainly due to barriers to biomedical care                                                                                                                                                                                                                                                                                                                                | C           |  |

|                     |         |                                                           |                                         |                     |     |   |                                                                                                                                                                                                                                                                                                                                                  |             |  |
|---------------------|---------|-----------------------------------------------------------|-----------------------------------------|---------------------|-----|---|--------------------------------------------------------------------------------------------------------------------------------------------------------------------------------------------------------------------------------------------------------------------------------------------------------------------------------------------------|-------------|--|
|                     |         | medicines treatment of cervical cancer                    |                                         | 18–59 years         |     |   | and community beliefs in the effectiveness of traditional medicines                                                                                                                                                                                                                                                                              |             |  |
| Yarney et al 2013   | Ghana   | Prevalence pattern and factors associated with use of CAM | Quantitative questionnaire based survey | cancer patients     | 98  | 7 | 73.5% were CAM users. Females young, married and highly educated were likely to use CAM. Massage followed by herbal were common CAM modalities used. Reasons for use were experimentation, akin with religious and cultural beliefs, disappointment with conventional treatment etc. 83.3% of users had not informed their doctor about CAM use. | A,B, C,D, E |  |
| <b>Eye Diseases</b> |         |                                                           |                                         |                     |     |   |                                                                                                                                                                                                                                                                                                                                                  |             |  |
| Achigbu, et al 2014 | Nigeria | Pattern and prevalence of the use of                      | Quantitative questionnaire              | out-patients attend | 202 | 6 | 83.2% have used TEM. Age (p=0.002 and occupation(p=0.0                                                                                                                                                                                                                                                                                           | A,B         |  |

|                      |         |                                                  |                                         |                              |       |   |                                                                                                                                                                                                                                                          |          |                                                                                                                              |
|----------------------|---------|--------------------------------------------------|-----------------------------------------|------------------------------|-------|---|----------------------------------------------------------------------------------------------------------------------------------------------------------------------------------------------------------------------------------------------------------|----------|------------------------------------------------------------------------------------------------------------------------------|
|                      |         | traditional medication                           | cross-sectional based survey            | the Eye Clinic               |       |   | 00) was associated with traditional medicine use                                                                                                                                                                                                         |          |                                                                                                                              |
| Ajite &Fadamiro 2013 | Nigeria | Prevalence of Harmful/Traditional Medication Use | Quantitative questionnaire based survey | Patients with eye conditions | 1420  | 8 | 3.4% reported using traditional eye medicine                                                                                                                                                                                                             | A        |                                                                                                                              |
| Eze et al 2009       | Nigeria | Prevalence and pattern of herbal medicine use    | Quantitative questionnaire based survey | ophthalmic outpatients       | 2,542 | 8 | 55% were users of traditional eye medicine. younger age, being married , residing in rural area were associated with herbal medicine use Being effective was the reason for used TEMs used were chemical substances , plant products and animal products | A,B, C,D | Having an ocular anterior segment disease delayed Presentation, low visual acuity, and presence of co-morbid chronic conditi |

|                           |              |                                                                   |                                                                               |                                                        |     |   |                                                                                                                                                                        |           |                                                                                                                                                          |
|---------------------------|--------------|-------------------------------------------------------------------|-------------------------------------------------------------------------------|--------------------------------------------------------|-----|---|------------------------------------------------------------------------------------------------------------------------------------------------------------------------|-----------|----------------------------------------------------------------------------------------------------------------------------------------------------------|
|                           |              |                                                                   |                                                                               |                                                        |     |   |                                                                                                                                                                        |           | on<br>were<br>clinical<br>factors<br>associa<br>ted<br>with<br>TEM<br>use                                                                                |
| Bisika et al 2009         | Malawi       | Self<br>Treatment<br>of Eye<br>Diseases                           | Quanti<br>tative<br>questi<br>onnair<br>e<br>based<br>househ<br>old<br>survey | Adul<br>ts(>2<br>0year<br>s)<br>repre<br>senta<br>tive | 800 | 6 | 28.6% used<br>traditional eye<br>medicines                                                                                                                             | A         |                                                                                                                                                          |
| Jaya and Masanganise 2014 | Zimbab<br>we | Prevalence,<br>types and<br>effects of<br>traditional<br>medicine | Quanti<br>tative<br>questi<br>onnair<br>e<br>based<br>survey                  | Ophth<br>almic<br>patie<br>nts                         | 361 | 7 | 61.5% patients<br>used TEM. TEM<br>use was<br>associated with<br>religion,<br>occupation and<br>place of<br>residence<br>Plant based<br>products were<br>commonly used | A,B<br>,D | signific<br>ant<br>associa<br>tions<br>betwe<br>n use<br>of<br>TEM<br>and<br>corneal<br>ulcerati<br>on,<br>corneal<br>vascula<br>risation<br>,<br>endoph |

|                        |         |                                                                                              |                                         |                           |      |   |                                                                                                                                                         |     |                                                                           |
|------------------------|---------|----------------------------------------------------------------------------------------------|-----------------------------------------|---------------------------|------|---|---------------------------------------------------------------------------------------------------------------------------------------------------------|-----|---------------------------------------------------------------------------|
|                        |         |                                                                                              |                                         |                           |      |   |                                                                                                                                                         |     | thalmitis, evisceration, exenteration and legal blindness at presentation |
| Nwosu & Obidiozor 2011 | Nigeria | Incidence and risk factors for traditional eye                                               | Quantitative questionnaire based survey | adult ophthalmic patients | 500  | 9 | 13.2% were traditional eye medicines (TEM) users. TEM users were likely to be older (>50 years), lived $\geq 25$ km outside health facility, uneducated | A,B |                                                                           |
| Ukponmwan & Momoh 2010 | Nigeria | Incidence and complications of traditional eye medications in Nigeria in a teaching hospital | Quantitative questionnaire based survey | Eye patients              | 7220 | 7 | 1.57% of patients had used traditional medicine. Users were likely to be residing in rural area.                                                        | A,B |                                                                           |
| <b>Surgical Care</b>   |         |                                                                                              |                                         |                           |      |   |                                                                                                                                                         |     |                                                                           |



|                   |              |                                                                        |                                         |                   |     |   |                                                                                                                                                                                                                                                                                                                                                                                                                                                          |         |  |
|-------------------|--------------|------------------------------------------------------------------------|-----------------------------------------|-------------------|-----|---|----------------------------------------------------------------------------------------------------------------------------------------------------------------------------------------------------------------------------------------------------------------------------------------------------------------------------------------------------------------------------------------------------------------------------------------------------------|---------|--|
| Nethathe 2016     | South Africa | Prevalence and factors associated with traditional herbal medicine use | Quantitative questionnaire based survey | Surgical patients | 508 | 8 | 39% participants reported past TM use and 7% admitted to current TM use. planned surgical procedure, HIV positive, current use of arthritic medication<br>Four per cent of TM users had an adverse reaction to the medication<br>eight respondents (2%) stated they received the medication free of charge, 148 respondents (30%) paid < ZAR 500 (US\$ 60) and 9 (2%) paid between ZAR 500–1000 (US\$ 60–119), 4 (1%) paid more than ZAR 1000 (US\$ 119) | A,G,H   |  |
| Onyeka et al 2012 | Nigeria      | Prevalence and pattern of use of herbal medicine                       | Quantitative questionnaire              | surgical patients | 60  | 8 | Variables such as age less than 35 years, female gender, being married                                                                                                                                                                                                                                                                                                                                                                                   | A,B,E,G |  |

|                                   |         |                                                                        |                                              |                  |     |   |                                                                                                                                                                                                                                    |     |  |
|-----------------------------------|---------|------------------------------------------------------------------------|----------------------------------------------|------------------|-----|---|------------------------------------------------------------------------------------------------------------------------------------------------------------------------------------------------------------------------------------|-----|--|
|                                   |         |                                                                        | based survey                                 |                  |     |   | and being an urban dweller did not show any significant difference in use. 87.5% did not inform their doctor of their herbal use. Perceived side effects of herbal medication (16.6%) included fever, waist pain and intoxication. |     |  |
| <b>DRY SEX , ABORTION and STI</b> |         |                                                                        |                                              |                  |     |   |                                                                                                                                                                                                                                    |     |  |
| Dienye et al 2013                 | Nigeria | Health Seeking Behaviours of Menopausal Women in an Out-Patient Clinic | cross-sectional, descriptive study           | Menopausal Women | 385 |   | 3.8% consulted a traditional healer                                                                                                                                                                                                | A   |  |
| Mbikusita-Lewanika et al 2009     | Zambia  | Prevalence and determinants dry sex traditional medicine use           | Mixed method Self-administered questionnaire | women            | 812 | 8 | 68.1% had ever used 56.2% & 11.9% were current and previous users of "dry sex traditional medicine                                                                                                                                 | A,B |  |

|                       |        |                                                         |                                                     |                                                         |     |   |                                                                                                                                                                                                                                                                               |     |  |
|-----------------------|--------|---------------------------------------------------------|-----------------------------------------------------|---------------------------------------------------------|-----|---|-------------------------------------------------------------------------------------------------------------------------------------------------------------------------------------------------------------------------------------------------------------------------------|-----|--|
|                       |        |                                                         | es, in-depth interviews and focus group Discussion. |                                                         |     |   | respectively (DSTM). 77%) of the sexually active respondents, had used DSTM. DSTM users were more likely to be older, married, with less educated, Christians, from the lower socio-economic level, homemakers, grew up in rural area and from the Eastern province of Zambia |     |  |
| Nuwaha & Muganzi 2008 | Uganda | Prevalence and determinants of traditional medicine use | Quantitative questionnaire based survey             | Adult presenting with STIs using both allopathic and TM | 224 | 6 | 54.9% were traditional medicine users. Users were likely married and educated. Use of traditional medicine is influenced by symptoms of STI and by having positive beliefs about traditional medicine and                                                                     | A,B |  |

|                                |          |                                                                                   |                                                                            |                                         |     |   |                                                                                                                                                                                          |     |                                                  |
|--------------------------------|----------|-----------------------------------------------------------------------------------|----------------------------------------------------------------------------|-----------------------------------------|-----|---|------------------------------------------------------------------------------------------------------------------------------------------------------------------------------------------|-----|--------------------------------------------------|
|                                |          |                                                                                   |                                                                            |                                         |     |   | traditional healers                                                                                                                                                                      |     |                                                  |
| Rasch & Kipingili, 2009        | Tanzania | use of traditional medicine for Unsafe abortion                                   | Quantitative questionnaire based survey                                    | women admitted with incomplete abortion | 751 | 8 | 16.9% and 22% had sought the help from traditional healer in rural and urban hospitals<br>Use of traditional healer was associated with primary education for both rural and urban women | A,B |                                                  |
| <b>Neurological Conditions</b> |          |                                                                                   |                                                                            |                                         |     |   |                                                                                                                                                                                          |     |                                                  |
| Abbo, C 2009                   | Kenya    | Profiles and outcome of traditional healing practices for severe mental illnesses | Mixed method study<br>Questionnaire based survey, FGD, in-depth interviews | Mental health patients                  | 400 | 5 | More than 80% of psychotic patients utilized both conventional and TCAM therapies                                                                                                        | A   | Better outcome for those who used both therapies |
| Adeosun et al 2013             | Nigeria  | Health seeking pattern among                                                      | Quantitative cross-sectional                                               | Schizophrenic patients                  | 138 | 7 | Traditional and religious healers were the first contact for the                                                                                                                         | A   |                                                  |

|                  |              |                                                                  |                                                         |                      |     |   |                                                                                                                        |   |                                                                                                                                  |
|------------------|--------------|------------------------------------------------------------------|---------------------------------------------------------|----------------------|-----|---|------------------------------------------------------------------------------------------------------------------------|---|----------------------------------------------------------------------------------------------------------------------------------|
|                  |              | Schizophrenic patients                                           | questionnaire based survey                              |                      |     |   | majority (69%) of the patients                                                                                         |   |                                                                                                                                  |
| Aghukwa ,2012    | Nigeria      | Care Seeking and Beliefs About the Cause of Mental Illness       | Quantitative cross-sectional questionnaire based survey | Psychiatric patients | 219 | 9 | 73.5% of patients seek care from traditional and religious healer                                                      | A | 59% attributed the illness to supernatural force and seeking psychiatric consultation at least five years after onset of disease |
| Burns et al 2010 | South Africa | pathway to care and clinical features of first-episode psychosis | Quantitative questionnaire based survey                 | Psychotic patients   | 54  | 5 | 38.5% and (49% had consulted a traditional healer and spiritual healer prior to their first visit to conventional care | A |                                                                                                                                  |

|                    |          |                                                              |                                         |                      |     |    |                                                                                                                 |   |                                                                                          |
|--------------------|----------|--------------------------------------------------------------|-----------------------------------------|----------------------|-----|----|-----------------------------------------------------------------------------------------------------------------|---|------------------------------------------------------------------------------------------|
| Girma et al 2011   | Ethiopia | Patterns of treatment seeking behaviour for mental illnesses | Quantitative questionnaire based survey | psychiatric patients | 384 | 10 | Half of patient first seek CAM therapy in the form of a religious healer 116 (30.2%) or an herbalist 77 (20.1%) | A |                                                                                          |
| Ibrahim et al 2016 | Ghana    | Pathways to psychiatric care for mental disorders            | Quantitative questionnaire based survey | Psychiatric patients | 107 | 9  | 23.3 % sought non-psychiatric treatment from religious or traditional healing centers as their first contact    | A | 52.3% and 21.5% seek care psychiatric and non-psychiatric general facility respectively. |
| Kauye et al 2014   | Malawi   | Pathway to care for psychiatric patients                     | Quantitative questionnaire based survey | Psychiatric patients | 128 | 6  | 22.7% of the patients had a native healer as a first carer                                                      | A | About half (48.2%) of all patients who saw a native healer as the first carer            |

|                    |         |                                                                            |                                         |                                      |     |   |                                                                                                                                                        |            |                                                                                                                                                  |
|--------------------|---------|----------------------------------------------------------------------------|-----------------------------------------|--------------------------------------|-----|---|--------------------------------------------------------------------------------------------------------------------------------------------------------|------------|--------------------------------------------------------------------------------------------------------------------------------------------------|
|                    |         |                                                                            |                                         |                                      |     |   |                                                                                                                                                        |            | spending more than 2 weeks before referral while about 67.0% of those who saw conventional health workers spent 3 days or less before referral . |
| Lagunju et al 2013 | Nigeria | Prevalence pattern and factors associated with use of traditional medicine | Quantitative questionnaire based survey | caregivers of children with epilepsy | 175 | 6 | 56.6% OF caregivers have d used CAM while 40%) of the 175 children had received CAM ever before seeking Western Medicine for the treatment of epilepsy | A,B, D , E |                                                                                                                                                  |

|                   |         |                                                           |                                         |                             |     |   |                                                                                                                                                                                                                                                  |     |                                              |
|-------------------|---------|-----------------------------------------------------------|-----------------------------------------|-----------------------------|-----|---|--------------------------------------------------------------------------------------------------------------------------------------------------------------------------------------------------------------------------------------------------|-----|----------------------------------------------|
|                   |         |                                                           |                                         |                             |     |   | Herbal preparations (39.4%), spiritual/prayer healing (34.3%), scarification (17.1%)<br>Children from low socioeconomic class whose mothers were less educated were likely to use CAM. 69.7% failed to disclose the use of traditional medicine. |     |                                              |
| Nwani et al 2013  | Nigeria | Treatment seeking Pattern among schizophrenic patients    | Quantitative questionnaire based survey | patients with Epilepsy      | 29  | 5 | 65.5% and 55.2% have used spirituality and traditional medicine respectively at the time of the study                                                                                                                                            | A   |                                              |
| Odinka et al 2014 | Nigeria | socio-demographic characteristics and patterns of health- | Quantitative questionnaire based survey | patients with schizophrenia | 367 | 8 | 76% of them had visited traditional faith healers as a first treatment option. than Older, and female patients living in the rural                                                                                                               | A,B | Long distance and use of traditional healers |



|                     |              |                                   |                    |                    |     |   |                                                                                                                                                                                                    |       |                                                                |
|---------------------|--------------|-----------------------------------|--------------------|--------------------|-----|---|----------------------------------------------------------------------------------------------------------------------------------------------------------------------------------------------------|-------|----------------------------------------------------------------|
|                     |              | seeking behaviour                 |                    |                    |     |   | areas, who practiced African Traditional Religion, with less than six years of education and Christian were more likely to have used traditional or faith healers.                                 |       | as first treatment option were associated with treatment delay |
| Sorketti et al 2012 | Sudan        | utilization of traditional healer | mixed method study | mental patients    | 405 | 8 | Most patients treated by traditional healers were less educated, male and jobless. 33% reported the cost of treatment in traditional health centre was less than conventional psychiatric services | A,B,H |                                                                |
| Tomita et al 2015   | South Africa | Health care seeking pattern       | Quantitative       | Psychotic patients | 57  | 9 | Traditional/religious healer were the first contact for 11.5% of respondents. Contact with THP was associated with                                                                                 | A     |                                                                |

|                    |          |                                                                                                                |                                         |                                                     |                                                     |   |                                                                                                                                                                                          |     |                                            |
|--------------------|----------|----------------------------------------------------------------------------------------------------------------|-----------------------------------------|-----------------------------------------------------|-----------------------------------------------------|---|------------------------------------------------------------------------------------------------------------------------------------------------------------------------------------------|-----|--------------------------------------------|
|                    |          |                                                                                                                |                                         |                                                     |                                                     |   | longer delay in seeking conventional care                                                                                                                                                |     |                                            |
| Winkler et al 2009 | Tanzania | Attitudes Towards African Traditional Medicine And Christian Spiritual Healing Regarding Treatment Of Epilepsy |                                         | 59 People with Epilepsy, 62 relatives, 46 villagers | 59 People with Epilepsy, 62 relatives, 46 villagers | - | The information about the costs of THM varied from 500 Tanzanian Shillings (TSH; 1000 TSH=1 US\$) to up to one cow (=equivalent of approximately 100.000 TSH)                            | H   |                                            |
| <b>Diabetes</b>    |          |                                                                                                                |                                         |                                                     |                                                     |   |                                                                                                                                                                                          |     |                                            |
| Baldé et al 2006   | Guinea   | Herbal medicine and treatment of diabetes                                                                      | Quantitative questionnaire based survey | Diabetic patients                                   | 397                                                 | 5 | 33% declared they used herbal medicine. Reasons for use include efficacy (74%), easy access to medicinal plants (70%), lower cost (48%), and search for complete cure of diabetes (37%). | A,D | majority of the users were satisfied (85%) |
| Lunyera et al 2016 | Tanzania | Prevalence and pattern of traditional medicine                                                                 | Quantitative questionnaire              | Adult male and female                               | 481                                                 | 8 | 77.1 % used traditional medicine for diabetes. 37.6 % used TMs and                                                                                                                       | A   |                                            |

|                         |         |                                                         |                                         |                                       |     |       |                                                                                                                                                                                                                  |           |                                                       |
|-------------------------|---------|---------------------------------------------------------|-----------------------------------------|---------------------------------------|-----|-------|------------------------------------------------------------------------------------------------------------------------------------------------------------------------------------------------------------------|-----------|-------------------------------------------------------|
|                         |         |                                                         | based survey                            | le resident with diabetes             |     |       | biomedicines concurrently                                                                                                                                                                                        |           |                                                       |
| Mwangi & Gitonga 2014   | Kenya   | Perceptions and Use of Herbal Remedies                  | quantitative interview schedules        | Diabetic patients                     | 258 | 6     | 12.4% reported using herbal medicine. Patients that were educated were likely users of herbal medicine                                                                                                           | A,B       |                                                       |
| Ogbera et al 2010       | Nigeria | Prevalence and determinants of traditional medicine use | Quantitative questionnaire based survey | Diabetic patients                     | 263 | 7     | 46% were CAM users. CAM users were likely to be older and literate. Main forms of CAM used were biological based therapies. All CAM users did not disclose the use of these methods of therapy to their doctors. | A,B, D, E | CAM users did not disclose use of CAM to their doctor |
| Rutebemberwa et al 2013 | Uganda  | Reasons for using herbal medicine                       | Qualitative                             | Diabetic patient, health workers, THP | 32  | ----- | Push factors such as difficulties accessing conventional care, shortage diabetic drugs and pull factor such as the                                                                                               | C         |                                                       |

|                                |         |                                                                 |                                                         |                       |     |   |                                                                                                                                                                                                                                                                                                                                           |        |  |
|--------------------------------|---------|-----------------------------------------------------------------|---------------------------------------------------------|-----------------------|-----|---|-------------------------------------------------------------------------------------------------------------------------------------------------------------------------------------------------------------------------------------------------------------------------------------------------------------------------------------------|--------|--|
|                                |         |                                                                 |                                                         |                       |     |   | affordability, availability and accessibility of traditional medicine, as well as being supplied in big quantities. Other pull factors are Traditional medicine convenient to take and was marketed aggressively by the herbalists. Influence of family and friends as well as traditional healers also drive use of traditional medicine |        |  |
| <b>MUSCLESKETAL CONDITIONS</b> |         |                                                                 |                                                         |                       |     |   |                                                                                                                                                                                                                                                                                                                                           |        |  |
| Aderibigbe et al 2013          | Nigeria | Determinant of utilization of traditional bone setting practice | Quantitative cross-sectional questionnaire based survey | adult male and female | 400 | 8 | 52.3% utilized a TBS. age, sex, marital status, occupation, ethnicity as well as the income level were associated with patronizing TBS. affordability, accessibility and                                                                                                                                                                  | A,B, C |  |

|                     |         |                                                                                            |                                                         |                        |     |   |                                                                                                                                       |     |  |
|---------------------|---------|--------------------------------------------------------------------------------------------|---------------------------------------------------------|------------------------|-----|---|---------------------------------------------------------------------------------------------------------------------------------------|-----|--|
|                     |         |                                                                                            |                                                         |                        |     |   | acceptability were pull factors of TBS use while health worker attitude, fear of amputation, hospital delays were the push factors.   |     |  |
| Akinpelu et al 2011 | Nigeria | Prevalence of Musculoskeletal Pain and Health seeking Behaviour among Occupational Drivers | Quantitative cross-sectional questionnaire based survey | Occupational Drivers   | 159 | 6 | Total of 47.2% (32.1% Herbal preparation, 2.5% traditional medicine 12.6% massage) used CAM therapies for their musculoskeletal pain. | A   |  |
| Mbada et al 2015    | Nigeria | Prevalence and modes of complementary and alternative medicine use                         | Quantitative questionnaire based survey                 | farmers                | 230 | 8 | Prevalence of CAM was 96.8 %. Herbal therapy and Massage was the most commonly used CAM method.                                       | A,D |  |
| Nwadiaro et al 2008 | Nigeria | Determinants of traditional healer utilization                                             | Quantitative questionnaire based survey                 | adults male and female | 250 | 5 | 9.9% visited a traditional bonesetter (TBS) on their own while 21% had previously been treated by TBS. 74.4% preferred                | A,C |  |

|                       |         |                                      |                                         |                         |     |   |                                                                                                                                                                                                                                |       |  |
|-----------------------|---------|--------------------------------------|-----------------------------------------|-------------------------|-----|---|--------------------------------------------------------------------------------------------------------------------------------------------------------------------------------------------------------------------------------|-------|--|
|                       |         |                                      |                                         |                         |     |   | orthodox fracture treatment. Fast recovery, cheap, accessible, less amputation, better outcome were main reasons for choosing TBS. Better diagnosis and hygiene and less complications were reasons for using biomedical care. |       |  |
| Obalum & Ogo 2011     | Nigeria | Prevalence and pattern of use of CAM | Quantitative questionnaire based survey | Osteoarthritis patients | 164 | 7 | 40.2% were CAM users. Herbal products were the frequently used CAM modality. No significant difference in demographics, clinical characteristics and pain control among CAM users and non-users                                | A,B,C |  |
| Onyemaechi et al 2015 | Nigeria | Patronage of                         | Quantitative                            | Patients with           | 418 | 7 | 31.6% of patients had visited a traditional bone                                                                                                                                                                               | A,C   |  |

|                      |        |                                                                              |                                                              |                                                                |     |   |                                                                                                                                                                                                                                                                                                                                        |     |  |
|----------------------|--------|------------------------------------------------------------------------------|--------------------------------------------------------------|----------------------------------------------------------------|-----|---|----------------------------------------------------------------------------------------------------------------------------------------------------------------------------------------------------------------------------------------------------------------------------------------------------------------------------------------|-----|--|
|                      |        | traditional<br>bonesetters                                                   | questi<br>onnair<br>e<br>based<br>survey                     | musc<br>ulosk<br>eletal<br>injur<br>ies                        |     |   | setter.Motivators<br>to use TBS<br>include advice of<br>relatives and<br>friends<br>; 29.2%);<br>perceived<br>cheaper cost of<br>treatment<br>25%);<br>sociocultural<br>belief (14.2%);<br>easy accessibility<br>(n=15; 12.5%);<br>fear of<br>amputation at the<br>hospital (n=13;<br>10.8%); and fear<br>of operation<br>(n=10; 8.3%) |     |  |
| <b>INFERTILITY</b>   |        |                                                                              |                                                              |                                                                |     |   |                                                                                                                                                                                                                                                                                                                                        |     |  |
| Kaadaaga, et al 2014 | Uganda | Prevalence<br>and factors<br>associated<br>with use of<br>herbal<br>medicine | Quanti<br>tative<br>questi<br>onnair<br>e<br>based<br>survey | wom<br>en<br>atten<br>ding<br>the<br>infert<br>ility<br>clinic | 260 | 6 | 76.2% of infertile<br>women have used<br>herbal medicine.<br>being married,<br>never<br>conceived and<br>infertility for less<br>than 3 years were<br>more likely to<br>use herbs while<br>those aged 30<br>years or less, less<br>educated and<br>lived with a                                                                        | A,B |  |

|                                                |         |                                                                |                                            |                                    |     |   |                                                                                                                                                                                                                                                                                                     |     |                                       |
|------------------------------------------------|---------|----------------------------------------------------------------|--------------------------------------------|------------------------------------|-----|---|-----------------------------------------------------------------------------------------------------------------------------------------------------------------------------------------------------------------------------------------------------------------------------------------------------|-----|---------------------------------------|
|                                                |         |                                                                |                                            |                                    |     |   | partner for less than three years were less likely to use herbal medicine.                                                                                                                                                                                                                          |     |                                       |
| Ola et al 2008                                 | Nigeria | determinant of health seeking behaviour                        | Mixed method FGD and questionnaire based   | male and female infertile patients | 152 | 7 | 69% and 46.1% of respondents used unorthodox care (TBA, faith healing, spiritualist, and herbalist) and chose it as first choice of care respectively. Socio-economic status, quality of care and level of education were significantly related to the choice of treatment outlets for infertility. | A,B |                                       |
| <b>General inpatients and outpatient group</b> |         |                                                                |                                            |                                    |     |   |                                                                                                                                                                                                                                                                                                     |     |                                       |
| Adibe M 2009                                   | Nigeria | Prevalence of concurrent use of herbal and synthetic medicines | Quantitative questionnaire cross-sectional | outpatients                        | 278 | 5 | 69.4% of respondents used both orthodox and traditional medicine. Being female, middle aged, educated and middle income were                                                                                                                                                                        | A,B | Failed to report the use of TCAM only |



|                   |         |                                                            |                                                         |                           |     |   |                                                                                                                                                                                                                                              |        |  |
|-------------------|---------|------------------------------------------------------------|---------------------------------------------------------|---------------------------|-----|---|----------------------------------------------------------------------------------------------------------------------------------------------------------------------------------------------------------------------------------------------|--------|--|
|                   |         |                                                            | based survey                                            |                           |     |   | predictors of dual use of orthodox and traditional medicine                                                                                                                                                                                  |        |  |
| Adinma et al 2015 | Nigeria | Pattern and practice of complementary alternative medicine | Quantitative cross-sectional questionnaire based survey | Adults outpatients        | 128 | 4 | 89.9% used TCAM. Biological based therapies were most used TCAM High cost of allopathic drug, availability of TCAM and health promotion and maintenance were reasons for use                                                                 | A,C, D |  |
| Fakeye et al 2008 | Nigeria | Prevalence and pattern of herbal medicine use              | Quantitative questionnaire based survey                 | Inpatient and outpatients | 265 | 7 | 72.4% of both in and outpatients were herbal medicine users. Specifically 18.5% and 90.0%, of inpatients and outpatients were herbal medicine users respectively. All herbal medicine users failed to disclose their status to their doctor. | A,E, G |  |

|                   |         |                                    |                                         |            |     |   |                                                                                                                                                                                                                          |   |                                                                                                                                     |
|-------------------|---------|------------------------------------|-----------------------------------------|------------|-----|---|--------------------------------------------------------------------------------------------------------------------------------------------------------------------------------------------------------------------------|---|-------------------------------------------------------------------------------------------------------------------------------------|
|                   |         |                                    |                                         |            |     |   | 9% experienced adverse effects with the use of herbs, whereas 2% experienced adverse reactions on coadministration with prescribed drugs                                                                                 |   |                                                                                                                                     |
| Fakeye et al 2010 | Nigeria | Self – medication among inpatients | Quantitative questionnaire based survey | Inpatients | 197 | 7 | Seventy four respondents (37.6%) were self medicating with herbs or conventional over-the-counter and prescription medicines, out of which twenty eight respondents (29.2%) were on herbal medicines while on admission. | A | The herbs were used for back pain and dysentery which might have been side effects of conventional drugs or secondary symptoms that |

|                   |              |                                                                 |                                            |             |     |   |                                                                                                                                                                                                                                                                                    |     |                                                                                     |
|-------------------|--------------|-----------------------------------------------------------------|--------------------------------------------|-------------|-----|---|------------------------------------------------------------------------------------------------------------------------------------------------------------------------------------------------------------------------------------------------------------------------------------|-----|-------------------------------------------------------------------------------------|
|                   |              |                                                                 |                                            |             |     |   |                                                                                                                                                                                                                                                                                    |     | came up after they had been admitted                                                |
| Kiguba et al 2016 | Uganda       | Herbal medicine use and linked suspected adverse drug reactions | Prospective cohort                         | Inpatients  | 762 | 6 | 18.3% of respondent have used one specific herbal medicine 10 suspected ADRs linked to pre-admission herbal medicine use including Commelina africana (4), multiple-herb-mumbwa (1), or unspecified local-herbs (5): three ADR-cases were abortion-related and one kidney-related. | A,G | Higher use was seen among patients in gynaecological ward compared to medical ward. |
| Marais et al 2015 | South Africa | Use of herbal remedies by patients visiting a tertiary hospital | Quantitative cross-sectional questionnaire | Outpatients | 100 |   | 74.2% of all respondents had used some form of unregistered herbal treatment at some stage during their lives. 82.1% were                                                                                                                                                          | A   | 35.8% of subjects would revisit their traditio                                      |

|                     |         |                                                                                            |                            |                                                     |     |   |                                                                                                                                                                                                                                                                                                             |          |                                                                                    |
|---------------------|---------|--------------------------------------------------------------------------------------------|----------------------------|-----------------------------------------------------|-----|---|-------------------------------------------------------------------------------------------------------------------------------------------------------------------------------------------------------------------------------------------------------------------------------------------------------------|----------|------------------------------------------------------------------------------------|
|                     |         |                                                                                            | based survey               |                                                     |     |   | bought from pharmacies and health shops. The remainder were directly obtained from traditional healers                                                                                                                                                                                                      |          | nal healer first, before seeking a consultation from their local clinic or doctor. |
| Oshikoya et al 2008 | Nigeria | Use of complementary and alternative medicines for children with chronic health conditions | questionnaire based survey | Children Outpatients with chronic health conditions | 318 | 8 | CAM was reportedly used by 99 (31%) patients (epilepsy -38%, sickle cell anaemia – 36% and asthma – 25%). The majority (84%) of these patients were currently using CAM Eighty-five (86%) parents were willing to discuss the use of CAM with their doctors but were not asked. CAM use was associated with | A,E, G,H |                                                                                    |

|                                                                                   |         |                                                                |                                                         |                                    |     |   |                                                                                                                                                                          |           |                                                                                             |
|-----------------------------------------------------------------------------------|---------|----------------------------------------------------------------|---------------------------------------------------------|------------------------------------|-----|---|--------------------------------------------------------------------------------------------------------------------------------------------------------------------------|-----------|---------------------------------------------------------------------------------------------|
|                                                                                   |         |                                                                |                                                         |                                    |     |   | adverse reactions in 7.1% of the patients<br>The average cost per month amongst the majority who used CAM every day was 8,500 (US\$ 70.1).                               |           |                                                                                             |
| <b>Asthma, infantile colic, Tuberculosis, Snake bit, Mycetoma and oral health</b> |         |                                                                |                                                         |                                    |     |   |                                                                                                                                                                          |           |                                                                                             |
| Adeyeye et al 2011                                                                | Nigeria | Pattern and prevalence of the use of CAM among asthma patients | Quantitative cross-sectional questionnaire based survey | asthmatic patients                 | 190 | 7 | 50.5% were currently using CAM. Cheaper, easily available, effective and less side effect were drivers of CAM use. Biological based therapies were the commonly used CAM | A,C,<br>D | Longer duration of asthma was associated with use of complementary and alternative medicine |
| Ezaldeen et al 2013                                                               | Sudan   | Herbal medicine for mycetoma                                   | Quantitative questionnaire based survey                 | patients with confirmed eumycetoma | 311 | 6 | 42.4% of the study population used herbal medicine for the treatment of eumycetoma at some stage of their illness.                                                       |           | commonly used herbs were Moringa oleifer                                                    |

|                     |         |                                                              |                                         |                                 |     |   |                                                                                                                                                                                                                                                                                                             |     |                                                                                                         |
|---------------------|---------|--------------------------------------------------------------|-----------------------------------------|---------------------------------|-----|---|-------------------------------------------------------------------------------------------------------------------------------------------------------------------------------------------------------------------------------------------------------------------------------------------------------------|-----|---------------------------------------------------------------------------------------------------------|
|                     |         |                                                              |                                         |                                 |     |   |                                                                                                                                                                                                                                                                                                             |     | a,<br>Acacia<br>nilotica<br>,<br>Citru<br>llus<br>colocy<br>nthis<br>and<br>Cumin<br>um<br>cyminu<br>m. |
| Lawal et al 2015    | Nigeria | knowledge of and utilization of traditional oral health care | Quantitative questionnaire based survey | Adult male and female residents | 390 | 7 | 8.7% participants visited a traditional healer for toothache. Males were more likely to be aware of traditional dental healers in their community. However no significant difference exist between those who visited and not visited a traditional tooth healer with respect to socio-demographic variables | A,B |                                                                                                         |
| Oshikoya et al 2009 | Nigeria | Self - medication                                            | Quantitative                            | infants                         | 800 | 7 | 32.8% used herbal medicine                                                                                                                                                                                                                                                                                  | A   |                                                                                                         |

|                   |              |                                                                                                          |                                         |                               |     |   |                                                                                                                                                                                                                                                                                   |     |  |
|-------------------|--------------|----------------------------------------------------------------------------------------------------------|-----------------------------------------|-------------------------------|-----|---|-----------------------------------------------------------------------------------------------------------------------------------------------------------------------------------------------------------------------------------------------------------------------------------|-----|--|
|                   |              | of herbal medicines                                                                                      | questionnaire based survey              |                               |     |   |                                                                                                                                                                                                                                                                                   |     |  |
| Sloan et al 2007  | South Africa | Healthcare-seeking behaviour and use of traditional healers                                              | Quantitative questionnaire based survey | in-patient snake bite victims | 50  | 7 | 62.5% of victims visited traditional medicine practitioner. THP consultation was associated with delay in accessing care at the hospital. Non-statistically significant trends towards THP use were observed if hospital access was poor or if patients were younger than 9 years | A,B |  |
| Ukwaja et al 2013 | Nigeria      | Healthcare-seeking behavior, treatment delays and its determinants among pulmonary tuberculosis patients | Quantitative questionnaire based survey | Tuberculosis patients         | 450 | 8 | 10% of tuberculosis patients initially visited a traditional healer                                                                                                                                                                                                               | A   |  |

**Student Population, healthcare professionals , academia and others**

|                      |         |                                                         |                                                         |                      |     |   |                                                                                                                                                                                                                                                                          |        |                                                     |
|----------------------|---------|---------------------------------------------------------|---------------------------------------------------------|----------------------|-----|---|--------------------------------------------------------------------------------------------------------------------------------------------------------------------------------------------------------------------------------------------------------------------------|--------|-----------------------------------------------------|
| Adomi PO 2014        | Nigeria | Attitude and use of herbal medicine                     | Quantitative cross-sectional questionnaire based survey | paramedical students | 193 | 3 | 53.9% of paramedical students had used herbal medicine. Being cheap, Recommendation by friends and family, were the main drivers. On the other hand, lack of evidence to support practice, fear of herbs being less safe and ineffective due contamination were barriers | A,C    |                                                     |
| Ahwinahwi et al 2016 | Nigeria | Prevalence of, attitude towards and barriers to CAM use | Quantitative cross-sectional questionnaire based survey | University students  | 450 | 7 | 81.78% had or currently using CAM. Herbal medicine was the mostly used CAM therapy. Low cost and absence of evidence to validate CAM practice were the key drivers and barriers to CAM use respectively.                                                                 | A,C, D | Malari a was the most cited indication for CAM use. |
| Alade et al 2016     | Nigeria | Extent of use and                                       | Quantitative                                            | High scho            | 228 | 6 | 38.4% of high school student                                                                                                                                                                                                                                             | A, C   |                                                     |



|                    |         |                                                                       |                                                               |                  |     |   |                                                                                                                                                                 |        |                                                                                                 |
|--------------------|---------|-----------------------------------------------------------------------|---------------------------------------------------------------|------------------|-----|---|-----------------------------------------------------------------------------------------------------------------------------------------------------------------|--------|-------------------------------------------------------------------------------------------------|
|                    |         | general knowledge of herbal medicines among adolescents               | questionnaire based survey                                    | of Adolescents   |     |   | used herbal medicine. natural and safe as well as effective were reason for use                                                                                 |        |                                                                                                 |
| Ameade et al 2016  | Ghana   | knowledge and attitude towards complementary and alternative medicine | Quantitative cross-sectional questionnaire based survey       | medical students | 284 | 7 | 59.0% of medical student were CAM users. Year of study and gender were not significantly associated with CAM use. Herbal medicine was widely used CAM modality. | A,B, D |                                                                                                 |
| Awodele et al 2012 | Nigeria | Attitudes towards the use of herbal medicine                          | Quantitative study cross-sectional questionnaire based survey | Doctors          | 300 | 5 | 20.7% of doctors reported use of herbal medicine                                                                                                                | A      | Age sex speciality prior knowledge of herbs were associated with willingness to recommend herbs |

|                     |         |                                                                     |                                         |                  |     |   |                                                                                                                                                                                                                                   |       |  |
|---------------------|---------|---------------------------------------------------------------------|-----------------------------------------|------------------|-----|---|-----------------------------------------------------------------------------------------------------------------------------------------------------------------------------------------------------------------------------------|-------|--|
| Dienye et al (2012) | Nigeria | Prevalence and correlates of traditional medicine use               | Quantitative questionnaire based survey | mothers          | 420 | 7 | 31.9% used crude oil as traditional medication. Older, less educated and women whose occupation was fishing were more likely to use crude oil. Being cheap, and hospital care being expensive and ineffective were reason for use | A,B,C |  |
| Enwere, 2009        | Nigeria | Prevalence and pattern of herbal medicine use                       | Quantitative questionnaire based survey | medical students | 125 | 6 | 28.1% were herbal medicine users. Males were more likely to use herbal medicine than females                                                                                                                                      | A,B   |  |
| Gyasi et al 2017    | Ghana   | Prevalence and determinants and pattern of traditional medicine use | Quantitative questionnaire based survey | College students | 754 | 9 | 89.1% of students used traditional medicine. Taking a science based course and being a Christian were strongly linked to traditional medicine use. herbal medicine followed by faith                                              | A,B,D |  |

|                   |              |                                                               |                                         |                                                             |    |   |                                                                                                                                                                                                            |     |  |
|-------------------|--------------|---------------------------------------------------------------|-----------------------------------------|-------------------------------------------------------------|----|---|------------------------------------------------------------------------------------------------------------------------------------------------------------------------------------------------------------|-----|--|
|                   |              |                                                               |                                         |                                                             |    |   | healing and mind-body therapies were the most commonly used TCAM                                                                                                                                           |     |  |
| James & Bah 2014  | Sierra Leone | Awareness, use, attitude and perceived need for CAM education | Quantitative questionnaire based survey | Pharmacy students                                           | 90 | 8 | All of pharmacy student have used one form of CAM. Herbal/Botanical/Supplements followed by Spirituality/Prayer were the most commonly used. pharmacy students had a positive attitude towards CAM         | A,D |  |
| James et al. 2016 | Sierra Leone | Use, attitude and perceived need for CAM education            | Quantitative questionnaire based survey | Final year Pharmacy students, medicine and nursing students | 68 | 9 | 61 % of final year healthcare students used CAM and no significant difference among the three cadres of students. All three groups of student show positive attitude towards CAM and interest to study CAM | A   |  |

|                       |              |                                                                                        |                                         |                                                     |                                                  |   |                                                                                                                                                                                                  |       |                                                     |
|-----------------------|--------------|----------------------------------------------------------------------------------------|-----------------------------------------|-----------------------------------------------------|--------------------------------------------------|---|--------------------------------------------------------------------------------------------------------------------------------------------------------------------------------------------------|-------|-----------------------------------------------------|
| Mbutho et al 2012     | South Africa | Healthcare providers' Knowledge, Attitudes and determinant of use of TCAM              | Quantitative questionnaire based survey | HIV/AIDS health care workers (HCW)                  | 161                                              | 5 | 23.5% OF HCW had used TCAM. Aromatherapy followed by massage were the common TCAM used. Being an African or isiZulu was more likely to use TCAM                                                  | A,B,D | health care workers lack basic knowledge about TCAM |
| Nworu et al 2015      | Nigeria      | Perception, usage and knowledge of herbal medicines by students and academic staff     | Quantitative questionnaire based survey | Students and academic staff                         | students (n = 1075) and academic staff (n = 177) | 6 | Most respondents (75.1%) had used some form of herbal medicine previously. While 36.4% are currently using herbal medicine                                                                       | A     |                                                     |
| van Staden et al 2014 | South Africa | Interest in and Willingness to Use Complementary, Alternative and Traditional Medicine | Quantitative questionnaire based survey | academic and administrative staff of the University | 2990                                             | 7 | 50.3% visited a TCAM practitioner. Recommendations from friend or relative, ineffectiveness of western medicine, don't like taking western drugs. Previous use of CAM, advertisement were common | A,C,D |                                                     |

|                       |          |                                                     |                                         |                                               |      |   |                                                                                                       |   |  |
|-----------------------|----------|-----------------------------------------------------|-----------------------------------------|-----------------------------------------------|------|---|-------------------------------------------------------------------------------------------------------|---|--|
|                       |          |                                                     |                                         |                                               |      |   | driver for the use of CAM. Homeopathy was the most common CAM therapy used                            |   |  |
| <b>Others</b>         |          |                                                     |                                         |                                               |      |   |                                                                                                       |   |  |
| Reniers& Tesfai, 2009 | Ethiopia | Health services utilization during terminal illness | Quantitative questionnaire based survey | close relatives or caretakers of the deceased | 597  | 6 | Traditional healer (11%) and holy water (46%) visits offer a common treatment and healing alternative | A |  |
| Odenwald et al 2007   | Somalia  | khat and other drugs in Somali combatants           | Quantitative questionnaire based survey | Military personnel                            | 8124 | 9 | 36.4% self-reported Khat used a week preceding interview                                              | A |  |
