# Supplementary material for: Traditional, complementary and alternative medicine use in Sub-Saharan Africa: a systematic review
Source: PubMed Central journal article supplement — BMJ Glob Health. 2018 Oct 31;3(5):e000895. doi: 10.1136/bmjgh-2018-000895 (PMC6231111; doi:10.1136/bmjgh-2018-000895), 2018-10-31
Supplement: bmjgh-2018-000895supp002.pdf [file bmjgh-2018-000895supp002.pdf]

**Supplementary file 2: Appraisal Score**

| Author/year            | Country | Methodology                               |                  |                    |                                                                      | Subscore | Reporting Participants Characteristics |        |     |                  |                           | Subscore | Reporting TCAM use  |                       |                | Subscore | Total Score |
|------------------------|---------|-------------------------------------------|------------------|--------------------|----------------------------------------------------------------------|----------|----------------------------------------|--------|-----|------------------|---------------------------|----------|---------------------|-----------------------|----------------|----------|-------------|
|                        |         | National representative sampling strategy | Sample size >500 | Response rate >75% | Low recall bias data collection on TCAM use within the past 12months |          | Age                                    | Gender | SES | Ethnicity /tribe | Location( Urban or rural) |          | Definition of TCA M | Assessed use of TCA M | Name type TCAM |          |             |
|                        |         | A                                         | B                | C                  | D                                                                    |          | E                                      | F      | G   | H                | I                         |          | J                   | K                     | L              |          |             |
| Abbo, C 2009           | Kenya   | x                                         | n n=400          | √                  | x not defined                                                        | 1        | √                                      | √      | √   | x                | x                         | 3        | x                   | √                     | x              | 1        | 5           |
| Abodunrin et al 2011   | Nigeria | X region                                  | X n=500          | √ 92.8%.           | x not defined                                                        | 1        | √                                      | √      | √   | x                | x                         | 3        | √                   | √                     | x              | 2        | 6           |
| Achigbu & Achigbu 2014 | Nigeria | X single site                             | X n=202          | √ 100%             | X not mentioned                                                      | 1        | √                                      | √      | √   | x                | x                         | 3        | x                   | √                     | √              | 2        | 6           |
| Addo, 2007             | Ghana   | X single site                             | √ n=611          | √ 100%             | X Herbal Medicine Ever-Use                                           | 2        | x                                      | √      | √   | x                | x                         | 2        | x                   | √                     | x              | 1        | 5           |
| Aderibigbe et al 2013  | Nigeria | X regional                                | X n=400          | √ 100%             | √                                                                    | 2        | √                                      | √      | √   | √                | x                         | 4        | x                   | √                     | √              | 2        | 8           |
| Adeosun et al 2013     | Nigeria | X Sub-national                            | X N=138          | √ 100%             | X not defined                                                        | 1        | √                                      | √      | √   | x                | x                         | 3        | √                   | √                     | √              | 3        | 7           |
| Adeyeye et al 2011     | Nigeria | X single site                             | X n=190          | √ 100%             | X no mentioned                                                       | 1        | √                                      | √      | √   | x                | x                         | 3        | √                   | √                     | √              | 3        | 7           |

|                      |         |                     |          |         |                            |   |   |   |   |   |   |   |   |   |   |   |   |
|----------------------|---------|---------------------|----------|---------|----------------------------|---|---|---|---|---|---|---|---|---|---|---|---|
| Adibe, MO 2009       | Nigeria | X single site       | X n=278  | √ 100%  | X not mentioned            | 1 | √ | √ | √ | x | x | 3 | x | √ | x | 1 | 5 |
| Adinma et al 2015    | Nigeria | X single site       | X n=128  | √ 100%  | X not mentioned            | 1 | x | √ | √ | x | x | 2 | x | √ | x | 1 | 4 |
| Adomi PO 2014        | Nigeria | X single university | X n=193  | X 66.3% | X not mentioned            | 0 | √ | √ | x | x | x | 2 | x | √ | x | 1 | 3 |
| Aghukwa ,2012        | Nigeria | x hospital          | X n=219  | √ 100%  | √                          | 2 | √ | √ | √ | √ | √ | 4 | √ | √ | √ | 3 | 9 |
| Ahwinahwi et al 2016 | Nigeria | X single university | X n=450  | √ 100%  | √                          | 2 | √ | √ | √ | x | x | 3 | x | √ | √ | 2 | 7 |
| Ajite &Fadamiro 2013 | Nigeria | X single site       | √ n=1420 | √ 100%  | √                          | 3 | √ | √ | √ | x | x | 3 | x | √ | √ | 2 | 8 |
| Akinpelu et al 2011  | Nigeria | X region            | X n=159  | √ 100%  | √                          | 2 | √ | √ | x | x | x | 2 | x | √ | √ | 2 | 6 |
| Alade et al (2016)   | Nigeria | Two high schools    | X n=228  | X n=72% | x not mentioned            | 0 | √ | √ | √ | √ | x | 4 | x | √ | √ | 2 | 6 |
| Allabi et al 2011    | Benin   | X region            | √ n=1000 | √ 76.8% | √                          | 2 | √ | √ | √ | x | x | 3 | x | √ | √ | 2 | 7 |
| Ameade et al 2016    | Ghana   | X university        | X n=284  | X 71.5% | X Ever personally used CAM | 0 | √ | √ | √ | x | √ | 4 | √ | √ | √ | 3 | 7 |
| Amira et al 2007     | Nigeria | X single site       | X n=225  | √ 100%  | X not mentioned            | 1 | √ | √ | x | x | x | 2 | √ | √ | √ | 3 | 6 |
| Aryeetey et al 2015  | Ghana   | X Sub-national      | X n=300  | √ 100%  | X not mentioned            | 1 | √ | √ | √ | x | x | 3 | x | √ | x | 1 | 5 |

|                      |              |                  |               |          |                                       |   |   |   |   |   |   |   |   |   |   |   |   |
|----------------------|--------------|------------------|---------------|----------|---------------------------------------|---|---|---|---|---|---|---|---|---|---|---|---|
| Asfaw& Mekuria 2016  | Ethiopia     | X single site    | X n= 423      | √ 97.39% | X CAM use since diagnosis             | 1 | √ | √ | √ | x | x | 3 | √ | √ | √ | 3 | 7 |
| Asuzu,et al (2015)   | Nigeria      | X single site    | x n=409       | √ 97.8%  | x ever patronizing traditional healer | 1 | √ | √ | √ | √ | x | 4 | √ | √ | x | 2 | 7 |
| Audet et al (2014)   | Mozambique   | X single site    | √ n=530       | √ 97.5%  | √                                     | 3 | √ | √ | √ | √ | √ | 5 | x | √ | x | 1 | 9 |
| Auerbach et al 2012  | Uganda       | X single site    | √ n=1000      | √        | √ current herb use                    | 3 | √ | √ | x | x | x | 2 | x | √ | √ | 2 | 7 |
| Awad &Eltayeb, 2006  | Sudan        | X                | √ n=1200      | √ 83.3%  | √ use 2months prior to interview      | 3 | √ | √ | √ | x | x | 3 | x | √ | √ | 2 | 8 |
| Awodele et al (2012) | Nigeria      | X region         | √ n= 520      | X 57.7%  | x ever used herbal medicine           | 1 | √ | √ | √ | x | x | 3 | x | √ | x | 1 | 5 |
| Awodele et al (2012) | Nigeria      | X single site    | X n= 354      | √ 100%   | √                                     | 2 | √ | √ | √ | x | x | 3 | x | √ | √ | 2 | 7 |
| Babb et al 2007      | South Africa | X single site    | X n=71        | X 62%    | X ever using TM                       | 0 | √ | √ | X | X | √ | 3 | X | √ | √ | 2 | 5 |
| Bakshi et al 2013    | Sierra Leone | X four districts | √ n n = 5951) | √ 99.1%  | x not defined                         | 2 | √ | √ | √ | √ | x | 4 | x | √ | x | 1 | 6 |

|                                 |              |                           |          |         |                                |   |   |   |   |   |   |   |   |   |   |   |   |
|---------------------------------|--------------|---------------------------|----------|---------|--------------------------------|---|---|---|---|---|---|---|---|---|---|---|---|
| Baldé et al 2006                | Guinea       | x hospital                | x n=397  | √100%   | √                              | 2 | x | x | √ | x | x | 1 | x | √ | √ | 2 | 5 |
| Bamidele et al 2009             | Nigeria      | X state                   | √ n=812  | √ 100%  | √                              | 3 | √ | √ | √ | x | x | 3 | x | √ | √ | 2 | 8 |
| Banda et al 2007                | Zambia       | X two health clinic       | √ n=1524 | X 74%   | √                              | 2 | √ | √ | √ | x | x | 3 | x | √ | x | 1 | 6 |
| Banwat et al 2015               | Nigeria      | X region                  | X n=390  | √ 100%  | X ever-used                    | 1 | √ | √ | √ | x | x | 3 | x | √ | x | 1 | 5 |
| Bayisa et al 2014               | Ethiopia     | X Single site             | X n=250  | √ 100%  | √ use during current pregnancy | 2 | √ | √ | √ | √ | x | 4 | x | √ | √ | 2 | 8 |
| Bepe et al 2011                 | Zimbabwe     | X hospital                | X N=151  | √100%   | √                              | 2 | √ | √ | √ | X | X | 3 | X | √ | X | 1 | 6 |
| Bisika et al 2009               | Malawi       | X two districts of Malawi | √ N=800  | √100%   | X not defined                  | 2 | √ | √ | √ | x | x | 3 | X | √ | X | 1 | 6 |
| Burns et al 2011                | South Africa | X hospital                | Xn=54    | √ 88%   | X not defined                  | 1 | √ | √ | x | √ | x | 3 | x | √ | x | 1 | 5 |
| Birhan et al 2011               | Ethiopia     | X THP facility            | X n=306  | √ 100%  | X not mentioned                | 1 | √ | √ | √ | x | x | 3 | x | √ | √ | 2 | 6 |
| Chingwaru& Vidmar 2016          | Zimbabwe     | X sub national            | X n=245  | X 63.3% | X not mentioned                | 0 | √ | √ | √ | x | x | 3 | x | √ | x | 1 | 4 |
| Chintamunne & Mahomoodally 2012 | Mauritius    | √ national representative | X n=334  | √ 100%  | X not defined                  | 2 | √ | √ | √ | x | √ | 4 | x | √ | √ | 2 | 8 |
| De Jager et al 2010             | South Africa | X region                  | X n=113  | √ 100%  | √ visited a                    | 2 | √ | √ | √ | √ | x | 4 | x | √ | x | 1 | 7 |

|                        |                 |                            |               |            | traditio<br>nal<br>healer<br>in the<br>precedi<br>ng year |   |   |   |   |   |   |   |   |   |   |   |    |
|------------------------|-----------------|----------------------------|---------------|------------|-----------------------------------------------------------|---|---|---|---|---|---|---|---|---|---|---|----|
| Diallo et al<br>2006   | Mali            | x two<br>districts         | √ n=<br>952   | √100%      | √                                                         | 3 | x | x | √ | x | x | 1 | x | √ | √ | 2 | 6  |
| Diaz et al<br>2013     | Sierra<br>Leone | X four<br>districts        | √ n=<br>6429  | √ 92.8     | √                                                         | 3 | √ | √ | √ | √ | √ | 5 | √ | √ | x | 2 | 10 |
| Dienye et al<br>(2012) | Nigeria         | X single<br>site           | X n=<br>420   | √ 100%     | x not<br>mentio<br>ned                                    | 1 | √ | √ | √ | x | x | 3 | √ | √ | √ | 3 | 7  |
| Duru et al<br>2016     | Nigeria         | X<br>region                | X<br>n=422    | √ 100%     | X Not<br>defined                                          | 1 | √ | √ | √ | x | x | 3 | x | √ | x | 1 | 5  |
| Duru et al<br>2016     | Nigeria         | X Single<br>site           | √N=500        | √ 100%     | √                                                         | 3 | √ | √ | √ | √ | x | 4 | x | √ | √ | 2 | 9  |
| Ebuehi et al<br>2012   | Nigeria         | X four<br>sites            | X<br>n=260    | √<br>96.2% | √<br>current<br>use of<br>TBA                             | 2 | √ | √ | √ | √ | X | 4 | X | √ | √ | 2 | 8  |
| Ekwunife et<br>al 2012 | Nigeria         | x two<br>hospitals         | x n=212       | √100%      | √                                                         | 1 | √ | √ | √ | x | √ | 4 | x | √ | x | 2 | 7  |
| Enwere O,<br>2009      | Nigeria         | X single<br>universit<br>y | X =125        | √<br>91.2% | √                                                         | 2 | √ | √ | x | x | x | 2 | x | √ | √ | 2 | 6  |
| Erku 2016              | Ethiopia        | X health<br>facility       | x<br>n=231    | √<br>84.4% | √                                                         | 2 | √ | √ | √ | x | x | 3 | √ | √ | √ | 3 | 8  |
| Ezaldeen et<br>al 2013 | Sudan           | X single<br>universit<br>y | X<br>n=311    | √100%      | X not<br>mentio<br>ned                                    | 1 | √ | √ | √ | x | x | 3 | x | √ | √ | 2 | 6  |
| Eze et al<br>2009      | Nigeria         | X single<br>site           | √ n=<br>2,542 | √ 100%     | √.                                                        | 3 | √ | √ | x | x | x | 2 | x | √ | √ | 2 | 8  |

|                              |                  |                        |           |          |                 |   |   |   |   |   |   |   |   |   |   |   |    |
|------------------------------|------------------|------------------------|-----------|----------|-----------------|---|---|---|---|---|---|---|---|---|---|---|----|
| Ezeome et al 2007            | Nigeria          | X single site          | X n=199   | √ 80.4%) | X not mentioned | 1 | √ | √ | √ | x | x | 3 | √ | √ | √ | 3 | 7  |
| Fakeye et al 2010            | Nigeria          | X Healthcare facility  | X n=197   | √ 94.3%  | √.              | 2 | √ | √ | √ | x | x | 3 | √ | √ | x | 2 | 7  |
| Fakeye et al 2009            | Nigeria hospital | x region               | √ n=600   | √ 99.1%  | X not defined   | 2 | √ | √ | √ | x | √ | 4 | √ | √ | x | 2 | 8  |
| Fakeye et al 2008            | Nigeria          | X Single site          | X n=265   | √ 100%   | √               | 2 | √ | √ | √ | x | x | 3 | √ | √ | √ | 3 | 8  |
| Farag et al (2013)           | Mali             | X two regions of Mali  | √ n=1,263 | √ 79.1   | √               | 3 | √ | √ | √ | x | x | 3 | x | √ | x | 1 | 7  |
| Flatie et al (2009)          | Ethiopia         | X single region        | √ n=570   | √ 100%   | x not defined   | 2 | √ | √ | x | x | x | 2 | x | √ | √ | 2 | 6  |
| Galabuzi et al 2010          | Uganda           | X single region        | X n=120   | √ 100%   | x not defined   | 1 | √ | √ | √ | x | x | 3 | x | x | √ | 1 | 5  |
| Gari et al 2015              | Ethiopia         | X region               | X n=282   | √ 100%   | X not defined   | 1 | √ | √ | √ | √ | x | 4 | x | √ | √ | 2 | 7  |
| Girma et al 2011             | Ethiopia         | X hospital based study | X n=384   | √ 100%   | √               | 2 | √ | √ | √ | √ | √ | 5 | √ | √ | √ | 3 | 10 |
| Graz et al 2015              | Mali             | X region               | √ 514     | √ 100%   | X not defined   | 2 | x | x | x | x | x | 0 | x | √ | x | 1 | 4  |
| Gyasi et al 2013             | Ghana            | X Single site          | X n=62    | √ 100%   | X not mentioned | 1 | √ | √ | √ | √ | √ | 5 | x | √ | √ | 2 | 8  |
| Gyasi et al 2015 (insurance) | Ghana            | X One region           | X N=324   | √ 100%   | √               | 2 | √ | √ | √ | √ | √ | 5 | x | √ | X | 1 | 8  |
| Gyasi et al 2015(p&p)        | Ghana            | X region               | X 324     | √ 100%   | √               | 2 | √ | √ | √ | √ | √ | 5 | x | √ | √ | 2 | 9  |

|                                    |              |                                                 |          |         |                 |   |   |   |   |   |   |   |   |   |   |   |   |
|------------------------------------|--------------|-------------------------------------------------|----------|---------|-----------------|---|---|---|---|---|---|---|---|---|---|---|---|
| Gyasi et al 2015(predictors)       | Ghana        | X region                                        | X 324    | √ 100%  | √               | 2 | √ | √ | √ | √ | √ | 5 | x | √ | √ | 2 | 9 |
| Gyasi et al 2015(spatial location) | Ghana        | X One region                                    | X N=324  | √ 100%  | √               | 2 | √ | √ | √ | √ | √ | 5 | x | √ | X | 1 | 8 |
| Gyasi et al 2017                   | Ghana        | X single university                             | √ n=754  | √ 83.8% | √               | 3 | √ | √ | √ | x | x | 3 | √ | √ | √ | 3 | 9 |
| Horwitz et al 2013                 | Uganda       | X rural                                         | X n=457  | √ 100%  | √               | 2 | √ | √ | √ | x | x | 3 | √ | √ | x | 2 | 7 |
| Hudges et al 2013                  | South Africa | X region                                        | X n=135  | √ 100%  | X not mentioned | 1 | √ | √ | √ | x | x | 3 | x | √ | x | 1 | 5 |
| Hudges et al 2015                  | South Africa | X region                                        | X n=458  | √ 99.5% | X not defined   | 1 | √ | √ | √ | x | √ | 4 | x | √ | x | 1 | 6 |
| Hughes et al 2012                  | South Africa | X two sites                                     | X n=100  | √ 97%   | X not mentioned | 1 | √ | √ | √ | x | √ | 4 | x | √ | x | 1 | 6 |
| Ibrahim et al 2016                 | Ghana        | X hospital                                      | X nn=107 | √ 100%  | √               | 2 | √ | √ | √ | √ | x | 4 | √ | √ | √ | 3 | 9 |
| James &Bah 2014                    | Sierra Leone | √ representative of pharmacy student population | x        | √ 91%.  | √               | 3 | √ | √ | √ | x | x | 3 | x | √ | √ | 2 | 8 |
| James et al 2016                   | Sierra Leone | √ representative of final year bachelor health  | X=68     | √ 100%  | √               | 3 | √ | √ | √ | x | √ | 4 | x | √ | √ | 2 | 9 |

|                           |          |                       |                        |         |                           |   |   |   |   |   |   |   |   |   |   |   |   |
|---------------------------|----------|-----------------------|------------------------|---------|---------------------------|---|---|---|---|---|---|---|---|---|---|---|---|
|                           |          | science student       |                        |         |                           |   |   |   |   |   |   |   |   |   |   |   |   |
| Jaya and Masanganise 2014 | Zimbabwe | x eye hospital        | x n=361                | √100%   | X not mentioned           | 1 | √ | √ | √ | x | √ | 4 | x | √ | √ | 2 | 7 |
| Jimoh et al 2013          | Nigeria  | x sub-urban community | √ n=500                | √100%   | √                         | 3 | √ | √ | √ | √ | x | 4 | x | √ | x | 1 | 8 |
| jombo et al 2010          | Nigeria  | X state               | √ n=2075               | √ 100%  | x not defined             | 2 | √ | √ | √ | x | x | 3 | x | √ | x | 1 | 6 |
| Kaadaaga et al 2014       | Uganda   | X single sit          | X n=280                | √ 92.9% | √                         | 2 | √ | √ | √ | x | x | 3 | x | √ | x | 1 | 6 |
| Kauye et 2015             | Malawi   | X                     | X n=128                | √ 100%  | √                         | 2 | √ | √ | √ | x | x | 3 | x | √ | x | 1 | 6 |
| Kiguba et al 2016         | Uganda   | x                     | √ n=762                | √ 100%  | √                         | 3 | x | √ | x | x | x | 1 | x | √ | √ | 2 | 6 |
| Kretchy et al 2014        | Ghana    | X two sites           | X n=400                | √ 100%  | x not mentioned specified | 1 | √ | √ | √ | x | x | 3 | x | √ | √ | 2 | 6 |
| Kruk et al 2011           | Liberia  | X region              | √ n=1435               | √ 99.9% | √                         | 3 | √ | √ | √ | √ | x | 4 | √ | √ | x | 2 | 9 |
| Labhardt et al            | Cameroon | x                     | X n=15                 | √ 100%  | x                         | 1 | √ | √ | √ | x | x | 3 | x | x | x | 0 | 4 |
| Ladele et al 2014         | Nigeria  | X region              | X n=140                | √ 100%  | X not mentioned           | 1 | √ | √ | √ | x | x | 3 | x | √ | x | 1 | 5 |
| Laelago et al 2016        | Ethiopia | X single site         | X n=363 pregnant women | √ 97%)  | √                         | 2 | √ | √ | √ | x | x | 3 | √ | √ | √ | 3 | 8 |



|                             |               |                   |         |          |                                                 |   |   |   |   |   |   |   |   |   |   |   |   |
|-----------------------------|---------------|-------------------|---------|----------|-------------------------------------------------|---|---|---|---|---|---|---|---|---|---|---|---|
| Langlois-Klassen et al 2007 | Uganda        | X three sites     | X n=137 | √100%    | x TM use since diagnosis                        | 1 | √ | √ | √ | √ | √ | 5 | x | √ | √ | 2 | 8 |
| Languju 2013                | Nigeria       | x hospital        | x n=175 | √100%    | √                                               | 2 | √ | √ | √ | x | x | 3 | x | √ | x | 1 | 6 |
| Lawal et al 2015            | Nigeria       | X region          | X n=390 | √ 100%   | x had consulted traditional healers in the past | 1 | √ | √ | √ | x | x | 3 | √ | √ | √ | 3 | 7 |
| Lubinga et al 2012          | Uganda        | X single          | X n=334 | √100%    | x TM use before starting ART                    | 1 | √ | √ | √ | √ | x | 4 | √ | √ | √ | 3 | 8 |
| Lunyera et al. 2016         | Tanzania      | X region          | X n=481 | √ 100%   | x ever used                                     | 1 | √ | √ | √ | √ | √ | 5 | x | √ | √ | 2 | 8 |
| Malan & Nueba 2011          | Côte d'Ivoire | X region          | X n=104 | √ 100%   | x not specified                                 | 1 | √ | √ | x | x | x | 2 | x | √ | √ | 2 | 5 |
| Malangu 2007                | South Africa  | X single hospital | X n=180 | √ 100%   | x not mentioned                                 | 1 | √ | √ | √ | x | x | 3 | x | √ | √ | 2 | 6 |
| Mbada et al. 2015           | Nigeria       | X region          | X n=230 | √ 93.9 % | √                                               | 2 | √ | √ | √ | √ | x | 4 | x | √ | √ | 2 | 8 |
| Mbereko & mahlatini 2014    | Zimbabwe      | X region          | X n=80  | √ 100%   | X utilized TH in the last                       | 1 | √ | √ | √ | x | x | 3 | x | √ | √ | 2 | 6 |

|                               |              |                                |           |          |                                 |   |   |   |   |   |   |   |   |   |   |   |    |
|-------------------------------|--------------|--------------------------------|-----------|----------|---------------------------------|---|---|---|---|---|---|---|---|---|---|---|----|
|                               |              |                                |           |          | five year                       |   |   |   |   |   |   |   |   |   |   |   |    |
| Mbikusita-Lewanika et al 2009 | Zambia       | X region                       | √ n= 812  | √ 100%   | √                               | 3 | √ | √ | √ | x | √ | 4 | x | √ | x | 1 | 8  |
| Mbutho et al 2012             | South Africa | X10 clinics                    | X n= 161  | X (50%   | x not mentioned                 | 0 | X | √ | √ | √ | X | 3 | x | √ | √ | 2 | 5  |
| Mee et al 2014                | South Africa | X region                       | √ n= 6392 | √ 92.8%) | √                               | 3 | √ | √ | √ | x | √ | 4 | x | √ | x | 1 | 8  |
| Mekuria et al. 2017           | Ethiopia     | X single site                  | X N= 364  | √ 100%   | √                               | 2 | √ | √ | √ | x | √ | 4 | √ | √ | √ | 3 | 9  |
| Mensah&Gyasi, 2012            | Ghana        | X region                       | X n=198   | √ 95.5%  | x use of HM/ in their life time | 1 | √ | √ | √ | x | √ | 4 | x | √ | x | 1 | 6  |
| Mncengeli et al 2016          | South Africa | X sub-national                 | X n=360   | √ >75%   | √                               | 2 | √ | √ | √ | √ | √ | 5 | X | √ | √ | 2 | 9  |
| Monera & mupanga 2012         | Zimbabwe     | X single site                  | X n= 255  | √ 97%    | √                               | 2 | √ | √ | √ | x | x | 3 | √ | √ | √ | 3 | 8  |
| Mothupi C 2014                | Kenya        | X Single site                  | X n= 384  | √ (87%   | √                               | 2 | √ | √ | √ | x | x | 3 | √ | √ | x | 2 | 7  |
| Mureyi et al 2012             | Zimbabwe     | X 12 sites                     | X n=246   | √ 100%   | √                               | 2 | √ | √ | √ | √ | √ | 5 | √ | √ | √ | 3 | 10 |
| Mwangi & Gitonga 2014         | Kenya        | X region                       | Xn=258    | √ 100%   | x not mentioned                 | 1 | √ | √ | √ | x | x | 3 | x | √ | √ | 2 | 6  |
| Namuddu et al 2011            | Uganda       | X two sites                    | X n= 401  | √ 95%    | √                               | 2 | √ | √ | √ | x | √ | 4 | √ | √ | √ | 3 | 9  |
| Nergard et al 2015            | Mali         | X three sites in three regions | X n= 211  | √ 99.1%  | x not mentioned                 | 1 | √ | √ | √ | x | √ | 4 | √ | √ | √ | 3 | 8  |

|                         |              |                                                  |             |            |                           |   |   |   |   |   |   |   |   |   |   |   |   |
|-------------------------|--------------|--------------------------------------------------|-------------|------------|---------------------------|---|---|---|---|---|---|---|---|---|---|---|---|
| Nethathe et al 2016     | South Africa | X single site                                    | √ n=508     | √ 97%      | √                         | 3 | √ | √ | √ | x | √ | 4 | x | √ | x | 1 | 8 |
| Njoroge & Kibunga 2007  | Kenya        | X region                                         | X n=42      | √ 100%     | x not defined             | 1 | x | x | x | x | x | 0 | x | √ | √ | 2 | 3 |
| Nlooto and Naidoo 2016  | South Africa | X 14 clinics in three hospitals in two districts | √ n=1766    | √ 98.98 %. | √                         | 3 | √ | √ | √ | √ | x | 4 | x | √ | X | 1 | 8 |
| Nuawaha & Musiguzi 2008 | Uganda       | X two districts                                  | X n=235     | √ 95%      | √                         | 2 | √ | √ | √ | x | √ | 4 | x | x | X | 0 | 6 |
| Nuwaha & Musiguzi 2013  | uganda       | X region                                         | X n=281     | √ 91.8%    | x ever used               | 1 | √ | √ | √ | x | √ | 4 | √ | √ | x | 2 | 7 |
| Nwadiaro et al 2008     | Nigeria      | X region                                         | x n=250     | x 74.4     | x Not specified           | 0 | √ | √ | √ | x | √ | 4 | x | √ | x | 1 | 5 |
| Nwaiwu & Oyelade 2016   | Nigeria      | X single site                                    | X n=100     | √ 78%      | x not mentioned specified | 1 | x | √ | √ | x | x | 2 | x | √ | √ | 2 | 5 |
| Nwani et al 2013        | Nigeria      | X sub-national                                   | X N=29      | √ 100%     | X TCAM ever used          | 1 | √ | √ | x | x | x | 2 | x | √ | √ | 2 | 5 |
| Nwosu & Obidiozor 2011  | Nigeria      | xSingle site                                     | √n=500      | √ 100%     | x not mentioned           | 2 | √ | √ | √ | √ | √ | 5 | x | √ | √ | 2 | 9 |
| Nworu et al             | Nigeria      | X single school                                  | √n=125<br>2 | √ 100%     | X Not defined             | 2 | √ | √ | x | x | x | 2 | √ | √ | x | 2 | 6 |

|                      |              |                             |           |          |                                      |   |   |   |   |   |   |   |   |   |   |   |    |
|----------------------|--------------|-----------------------------|-----------|----------|--------------------------------------|---|---|---|---|---|---|---|---|---|---|---|----|
| Nxumalo et al 2011   | South Africa | √ national household survey | √ n=4762  | √ 100%   | √                                    | 4 | √ | √ | √ | √ | √ | 5 | √ | √ | X | 2 | 11 |
| Nyeko et al 2016     | uganda       | X 4 sites                   | X n=383   | √ 100%   | √                                    | 2 | √ | √ | √ | x | √ | 4 | √ | √ | x | 2 | 8  |
| Obalum & Ogo 2011    | Nigeria      | X single site               | X n=164   | √ 100%   | √                                    | 2 | √ | √ | x | x | x | 2 | √ | √ | √ | 3 | 7  |
| Odenwald et al 2007  | Somalia      | X not randomly sampled      | √ N=8,723 | √ 93.1%  | √ Khat use 1 week prior to interview | 3 | √ | √ | √ | x | √ | 4 | x | √ | √ | 2 | 9  |
| Odinka et al 2014    | Nigeria      | X region                    | X n=367   | √ 98.1%  | x not defined                        | 1 | √ | √ | √ | x | √ | 4 | √ | √ | √ | 3 | 8  |
| Ogbera et al 2010    | Nigeria      | X two sites                 | X n=263   | √ 100%   | X not defined                        | 1 | √ | √ | √ | x | x | 3 | √ | √ | √ | 3 | 7  |
| Okoronkwo et al 2014 | Nigeria      | X region                    | √ n=1000  | X 73.2%. | x not defined                        | 1 | √ | √ | √ | x | x | 3 | x | √ | √ | 2 | 6  |
| Ola et al 2008       | Nigeria      | X region                    | X n=152   | √ 100%   | x not defined                        | 1 | √ | √ | √ | x | x | 3 | √ | √ | √ | 3 | 7  |
| Olisa & Oyelola 2009 | Nigeria      | x                           | √ n=500   | √ 96%.   | √                                    | 3 | √ | √ | √ | x | x | 3 | √ | √ | √ | 3 | 9  |
| Ologe et al 2008     | Nigeria      | X single site               | √ n=500   | X 67%    | √ ,                                  | 2 | √ | √ | √ | x | x | 3 | √ | √ | √ | 3 | 8  |
| Olusanya et al. 2011 | Nigeria      | X region                    | √ n=6,706 | √ 100%   | x not mentioned                      | 2 | √ | √ | √ | √ | x | 4 | √ | √ | √ | 3 | 9  |
| Onifade et al 2013   | Nigeria      | X two sites                 | √ n=640   | √ 100%   | x not defined                        | 2 | x | x | x | x | x | 0 | x | √ | x | 1 | 3  |
| Onyeka et al 2012    | Nigeria      | X single site               | X n=60    | √ 100%   | √                                    | 2 | √ | √ | √ | x | √ | 4 | x | √ | √ | 2 | 8  |

|                       |                                   |                                           |                  |                          |                           |   |   |   |   |   |   |   |   |   |   |   |    |
|-----------------------|-----------------------------------|-------------------------------------------|------------------|--------------------------|---------------------------|---|---|---|---|---|---|---|---|---|---|---|----|
| Onyemaechi et al 2015 | Nigeria                           | X Single hospital                         | X n=120          | √ 90.9%                  | √                         | 2 | √ | √ | √ | x | x | 3 | x | √ | √ | 2 | 7  |
| Onyapat et al, 2011   | Nigeria                           | X state                                   | √ n=1000         | X 73.2%                  | Not mentioned x           | 1 | √ | √ | √ | x | x | 3 | √ | √ | √ | 3 | 7  |
| Opara& Osayi 2016     | Nigeria                           | X region                                  | √n= 600          | √ 92.8                   | x not mentioned           | 2 | x | x | x | x | x | 0 | x | √ | x | 1 | 3  |
| Oregba et al 2011     | Nigeria                           | X state                                   | X n= 388         | √ 100%                   | √                         | 2 | √ | √ | √ | x | x | 3 | x | √ | √ | 2 | 7  |
| Osamor et al 2010     | Nigeria                           | X a state                                 | X n=440          | 100%√                    | Not mentioned x           | 1 | √ | √ | √ | x | x | 3 | x | √ | x | 1 | 5  |
| Osemene et al 2013    | Nigeria                           | X nationwide but not representative       | X =360           | √ 83.3                   | x                         | 1 | √ | √ | √ | √ | √ | 5 | x | √ | x | 1 | 7  |
| Oshikoya et al 2008   | Nigeria                           | X Single site                             | X n= 318         | √ 100%                   | √                         | 2 | √ | √ | √ | x | x | 3 | √ | √ | √ | 3 | 8  |
| Oshikoya et al 2009   | Nigeria                           | X Single site                             | √ n= 800         | √ 76%                    | x not mentioned specified | 2 | √ | √ | √ | x | x | 3 | x | √ | √ | 2 | 7  |
| Oshikoya et al 2014   | Nigeria                           | Single site                               | Xn=187           | √ 100%                   | √                         | 2 | √ | √ | √ | x | x | 3 | √ | √ | √ | 3 | 8  |
| Otang et al 2011      | South Africa                      | X Single site                             | Xn=101           | √ 100%                   | x ever used               | 1 | √ | √ | √ | x | x | 3 | x | √ | √ | 2 | 6  |
| Oyebode et al 2016    | Middle-income countries including | √ Multi-national using national represent | √N= Total 35 334 | √ ≥75% in both Ghana and | √ consultation with a TM  | 4 | √ | √ | √ | x | √ | 4 | √ | √ | x | 2 | 10 |

|                         | g Ghana and South Africa            | ative sample                                          | Ghana=4661 and South Africa =3411 | South Africa            | practitioner in the last 12 months        |   |   |   |   |   |   |   |   |   |   |   |    |
|-------------------------|-------------------------------------|-------------------------------------------------------|-----------------------------------|-------------------------|-------------------------------------------|---|---|---|---|---|---|---|---|---|---|---|----|
| Peltzer et al 2008      | South Africa                        | X three sites                                         | √ n=618                           | √ 100%                  | √                                         | 3 | √ | √ | √ | √ | √ | 5 | √ | √ | √ | 3 | 11 |
| Peltzer et al 2010      | South Africa                        | X Three sites                                         | √ N = 735                         | X 70.6%                 | √                                         | 2 | √ | √ | √ | √ | √ | 5 | √ | √ | √ | 3 | 10 |
| Peltzer et al 2011      | South Africa                        | X Three sites                                         | √ N = 735                         | √ 100%                  | √                                         | 3 | √ | √ | √ | x | √ | 4 | √ | √ | √ | 3 | 10 |
| Pouliot M, 2011         | Burkina Faso                        | X region                                              | X N=205                           | √ 100%                  | √                                         | 2 | √ | √ | √ | x | x | 3 | √ | √ | x | 2 | 7  |
| Plezter & Pengpid 2016  | 32 countries including South Africa | √ Multi-national using national representative sample | √ N=52,801                        | √ 85.9% in South Africa | √ 12-month TCAM provider use was assessed | 4 | √ | √ | √ | x | √ | 4 | √ | √ | x | 2 | 10 |
| Ranasinghe et al 2015   | Sierra Leone                        | X region                                              | √ n=824                           | √ 98.3%                 | x not defined                             | 2 | √ | √ | √ | x | √ | 4 | x | √ | √ | 2 | 8  |
| Rasch & Kipingili, 2009 | Tanzania                            | x hospitals                                           | √ n=751                           | √ 84.3%                 | √                                         | 3 | √ | √ | √ | x | √ | 4 | x | √ | x | 1 | 8  |
| Reniers & Tesfai 2009   | Ethiopia                            | Sub-national                                          | √ n=597                           | √ 78.6%                 | X Not defined                             | 2 | √ | √ | √ | x | x | 3 | x | √ | x | 1 | 6  |
| Sarki & Danjuma 2015    | Nigeria                             | X region                                              | X n=350                           | √ 100%                  | x not mentioned                           | 1 | √ | √ | √ | x | x | 3 | x | √ | x | 1 | 5  |
| Sarmiento et al 2016    | Nigeria                             | X regional                                            | √ N=8089                          | √ 90.3%                 | √                                         | 3 | √ | √ | √ | X | √ | 4 | √ | √ | X | 2 | 9  |

|                                        |                 |                                     |              |             |                        |   |   |   |   |   |   |   |   |   |   |   |   |
|----------------------------------------|-----------------|-------------------------------------|--------------|-------------|------------------------|---|---|---|---|---|---|---|---|---|---|---|---|
| Sato 2012<br>Vol 75, Issue<br>8        | Ghana           | xTwo<br>regions                     | √ n=<br>4713 | √<br>100%   | √                      | 3 | √ | √ | √ | x | √ | 4 | √ | √ | x | 2 | 9 |
| Sato 2012<br>Vol. 40, No.<br>11        | Ghana           | xTwo<br>regions                     | √ n=<br>4713 | √<br>100%   | √                      | 3 | √ | √ | √ | x | √ | 4 | √ | √ | x | 2 | 9 |
|                                        |                 |                                     |              |             |                        |   |   |   |   |   |   |   |   |   |   |   |   |
| Sloan et al<br>2007                    | South<br>Africa | X health<br>facility                | X n=50       | √<br>100%   | √                      | 2 | √ | √ | x | x | x | 2 | √ | √ | √ | 3 | 7 |
| Sorketti et al<br>2012                 | Sudan           | √<br>represent<br>ative             | X<br>n=405   | √<br>100%   | √                      | 3 | √ | √ | √ | x | √ | 4 | x | √ | x | 1 | 8 |
| Stanifer et al<br>2015                 | Tanzani<br>a    | X region                            | √ n=605      | √<br>100%   | √                      | 3 | √ | √ | √ | √ | √ | 5 | x | √ | x | 1 | 9 |
| Suroowan<br>&<br>Mahomoodal<br>ly,2013 | Mauritiu<br>s   | √<br>national<br>represent<br>ative | x<br>n=384)  | √<br>86% %  | x                      | 2 | √ | √ | √ | x | x | 3 | x | x | √ | 1 | 6 |
| Tamuno et al<br>2010                   | Nigeria         | X Single<br>site                    | √ n=<br>500  | √ 100%      | √                      | 3 | √ | √ | √ | x | x | 3 | x | √ | x | 1 | 7 |
| Tamuno,<br>2011                        | Nigeria         | X Single<br>hospital                | X<br>n=430   | √<br>93.0%  | X not<br>defined       | 1 | √ | √ | √ | x | x | 3 | x | √ | x | 1 | 5 |
| Thielman et<br>al 2014                 | Tanzani<br>a    | X sub<br>national                   | X N=<br>442  | √ 100%      | X not<br>defined       | 1 | √ | √ | √ | x | √ | 4 | √ | √ | x | 2 | 7 |
| Tomita et al<br>2015                   | South<br>Africa | X Single<br>site                    | X n=57       | √<br>92.0%. | √                      | 2 | √ | √ | √ | √ | √ | 5 | √ | √ | x | 2 | 9 |
| Ukponmwan<br>& Momoh<br>2010           | Nigeria         | xSingle<br>site                     | √<br>n=7220  | √ 100%      | x not<br>mentio<br>ned | 2 | √ | √ | x | x | √ | 3 | x | √ | √ | 2 | 7 |
| Ukwaja et al<br>2013                   | Nigeria         | X three<br>health<br>facilities     | X<br>n=450   | √ 100%      | √                      | 2 | √ | √ | √ | x | √ | 4 | x | √ | √ | 2 | 8 |

|                               |              |                     |           |          |                 |   |   |   |   |   |   |   |   |   |   |   |   |
|-------------------------------|--------------|---------------------|-----------|----------|-----------------|---|---|---|---|---|---|---|---|---|---|---|---|
| Usifor et al 2013             | Nigeria      | X state             | X=400     | √ 75%    | Not mentioned x | 1 | √ | √ | √ | x | x | 3 | x | √ | x | 1 | 5 |
| van Staden and Joubert , 2014 | South Africa | X single university | √ n= 2990 | X 5.5%,  | x not mentioned | 1 | √ | √ | √ | √ | x | 4 | x | √ | √ | 2 | 7 |
| Wassie et al 2015             | Ethiopia     | X region            | X n=403   | √ 97.3%, | x not defined   | 1 | √ | √ | √ | x | x | 3 | x | √ | √ | 2 | 6 |
| Yarney et al 2013             | Ghana        | X Single site       | X n=98    | √ 100%   | x not mentioned | 1 | √ | √ | √ | x | x | 3 | √ | √ | √ | 3 | 7 |
